1 Combined epidemiological and genomic analysis of nosocomial SARS-CoV-2  
2 transmission identifies community social distancing as the dominant  
3 intervention reducing outbreaks

4 **AUTHORS**

5 Luke B Snell 1, 2

6 Chloe L Fisher 3

7 Usman Taj 2

8 Blair Merrick 1, 2

9 Adela Alcolea-Medina 5

10 Themoula Charalampous 1

11 Adrian W Signell 4

12 Harry D Wilson 4

13 Gilberto Betancor 4

14 Mark Tan Kia Ik 1

15 Emma Cunningham 5

16 Penelope R Cliff 5

17 Suzanne Pickering 4

18 Rui Pedro Galao 4

19 Rahul Batra 1, 2

20 Stuart J D Neil 4

21 Michael H Malim 4

22 Katie J Doores 4  
23 Sam T Douthwaite 2  
24 Gaia Nebbia 1, 2  
25 Jonathan D Edgeworth<sup>^</sup> 1, 2  
26 Ali R Awan<sup>^</sup> 3  
27 & The COVID-19 Genomics UK (COG-UK) consortium\* 6

28

29 <sup>^</sup>These authors are joint corresponding authors.

30 \*Full list of consortium names and affiliations are in the appendix.

31

## 32 **AFFILIATIONS**

33 1 Centre for Clinical Infection and Diagnostics Research, Department of Infectious Diseases, School of  
34 Immunology and Microbial Sciences, King's College London

35 2 Directorate of Infection, Guy's and St Thomas' NHS Foundation Trust

36 3 Genomics Innovation Unit, Guy's and St. Thomas' NHS Foundation Trust

37 4 Department of Infectious Diseases, King's College London

38 5 Infection Sciences, Viapath, St Thomas' Hospital, London

39 6 <https://www.cogconsortium.uk>

40

41

42

43 **FUNDING**

44 This work was supported by the King's Together Multi and Interdisciplinary Research Scheme (Wellcome Trust  
45 Revenue Retention Award, and the National Institute for Health Research (NIHR) Biomedical Research Centre  
46 programme of Infection and Immunity (RJ112/N027) based at Guy's and St Thomas' National Health Service  
47 (NHS) Foundation Trust and King's College London.

48

49 COG-UK is supported by funding from the Medical Research Council (MRC) part of UK Research & Innovation  
50 (UKRI), the National Institute of Health Research (NIHR) and Genome Research Limited, operating as the  
51 Wellcome Sanger Institute.

52 **ETHICS**

53 Favourable opinion to conduct this work was granted by the North West Preston Research Ethics Committee  
54 (Reference 18/NW/0584)

55 The COVID-19 Genomics UK (COG-UK) consortium study protocol was approved by the Public Health  
56 England Research Ethics and Governance Group (reference: R&D NR0195).

57

58 **ABSTRACT**

59 Many healthcare facilities report SARS-CoV-2 outbreaks but transmission analysis is complicated by the high  
60 prevalence of infection and limited viral genetic diversity. The contribution of different vectors to nosocomial  
61 infection or the effectiveness of interventions is therefore currently unclear. Detailed epidemiological and viral  
62 nanopore sequence data were analysed from 574 consecutive patients with a PCR positive SARS-CoV-2 test  
63 between March 13th and March 31st, when the pandemic first impacted on a large, multisite healthcare  
64 institution in London. During this time the first major preventative interventions were introduced, including  
65 progressive community social distancing (CSD) policies leading to mandatory national lockdown, exclusion of  
66 hospital visitors, and introduction of universal surgical facemask-use by healthcare-workers (HCW). Incidence  
67 of nosocomial cases, community SARS-CoV-2 cases and infection in a cohort of 228 HCWs followed the same  
68 dynamic course, decreasing shortly after introduction of CSD measures and prior to the main hospital-based  
69 interventions. We investigated clusters involving nosocomial cases based on overlapping ward-stays during  
70 the 14-day incubation period and SARS-CoV-2 genome sequence similarity. Our method placed 63 (79%) of  
71 80 sequenced probable and definite nosocomial cases into 14 clusters containing a median of 4 patients (min  
72 2, max 19) No genetic support was found for the majority of epidemiological clusters (31/44, 70%) and  
73 genomics revealed multiple contemporaneous outbreaks within single epidemiological clusters. We included  
74 a measure of hospital enrichment compared to community cases to increase confidence in our clusters, which  
75 were 1-14 fold enriched. Applying genomics, we could provide a robust estimate of the incubation period for  
76 nosocomial transmission, with a median lower bound and upper bound of 6 and 9 days respectively. Six (43%)  
77 clusters spanned multiple wards, with evidence of cryptic transmission, and community-onset cases could not  
78 be identified in more than half the clusters, particularly on the elective hospital site, implicating HCW as vectors  
79 of transmission. Taken together these findings suggest that CSD had the dominant impact on reducing  
80 nosocomial transmission by reducing HCW infection.

81

## 82 INTRODUCTION

83 Severe acute respiratory syndrome coronavirus 2 (SARS-CoV-2) was first reported in Wuhan, China in  
84 December 2019 (1), since when over 40 million infections and 1 million deaths have been reported worldwide  
85 (2). New cases in the UK peaked during the first wave after implementation of progressive community social  
86 distancing (CSD) (3), starting with an announcement on March 16th that, with few exceptions, the whole UK  
87 population must stay at home, later being made mandatory on March 23rd. COVID-19 hospital admission then  
88 peaked around 8 days later (4).

89 The first few weeks of the pandemic were unique, due to introduction of SARS-CoV-2 into populations without  
90 prior immunity. Society and healthcare organisations were adapting to the pandemic for the first time with  
91 frequent new infection control policies and behavioural changes while incidence was still accelerating. During  
92 the first wave, elective hospital admissions were often postponed (5). Currently, hospitals around the world  
93 either have, or are preparing for, a further influx of COVID-19 patients, while restarting and rescheduling  
94 postponed non-COVID-19 work. It is therefore important to identify evidence from these first few weeks to help  
95 healthcare organisations efficiently plan for any subsequent increase in cases.

96 Most COVID-19 transmission studies to date have utilised epidemiological analysis alone to identify outbreaks,  
97 including those from the UK (6) (7), China (8), France (9) and South Korea (10). The main limitation with using  
98 epidemiology alone is that when point prevalence is high, for instance at 2.2% in London during the first wave  
99 in April 2020 (11), this increases the chance two people in epidemiological contact are independent cases.  
100 Furthermore, a wide incubation period of between 2 and 14 days (12,13) makes it difficult to define hospital-  
101 onset cases as hospital-acquired, as even when they arise several days after admission to hospital the  
102 transmission event may still have occurred in the community.

103 To improve the confidence in detecting hospital clusters, epidemiological analysis can be supplemented with  
104 genomic data obtained by sequencing viral isolates. For COVID-19, thus far only two published studies have  
105 used genomic sequencing to analyse hospital transmission (14) (15). However, application of genomic data  
106 to the spread of SARS-CoV-2 is not straightforward, particularly as during early stages of the pandemic, genetic  
107 diversity was low with less than 200 mutations registered in the international GISAID database by April 2020  
108 (16). SARS-CoV-2 also has a low mutation rate with only 2-3 mutations per genome per month (17). These  
109 factors increase the chance that two people infected with virus sharing identical genetic sequence are not  
110 closely epidemiologically linked cases. However, epidemiological linkage combined with viral sequence data

111 can provide stronger evidence for a COVID-19 transmission cluster than would be possible with either source  
112 of data alone.

113 Nosocomial infection is reported to account for around 10-20% of all confirmed cases (18) (19) (6) (20) often  
114 in designated outbreaks (6) (7) (8) (9) (10) and with a crude death rate of up to 30% (19). The most likely  
115 routes of transmission are between patients and involving healthcare workers (HCW) , with potential for all  
116 combinations of directionality to occur within the same nosocomial cluster. In each case, the transmitting  
117 individual may be either symptomatic or asymptomatic. There is also potential for super-spreading events (21).  
118 It is important to determine the contribution of each pathway to help prioritise resourcing of interventions. Most  
119 hospitals excluded visitors, who are an alternate source for introducing infection, and although the environment  
120 can become contaminated with infectious droplets, cleaning policies effectively removes virus from the  
121 environment (22), so fomite spread remains an unproven mode of transmission (23). Airborne transmission  
122 via aerosols remains controversial (23).

123 The aim of this study was to develop a methodology for combining epidemiological and genomics analysis of  
124 SARS-CoV-2 transmission to help determine the pathways for nosocomial transmission during the first wave  
125 of the pandemic. During this time there was a high incidence in the community (11) and high incidence of  
126 COVID-19 infection amongst healthcare workers (HCWs) as judged by subsequent seroconversion (24) (25).

127

## 128 RESULTS

### 129 **Setting, clinical characteristics and epidemiology of cases in the first wave of the pandemic**

130 SARS-CoV-2 PCR testing for all hospital admissions and inpatients with compatible clinical symptoms of new  
131 fever or cough was commenced on March 13th in line with national UK recommendations. Between 80 and  
132 150 SARS-CoV-2 PCR tests were performed per day until the end of April when testing increased further  
133 (Table S1), with 637 positive tests on 574 individuals up until March 31st. The majority of positive cases were  
134 admitted to hospital (483/574, 84%, Table S4), consistent with national recommendations to only test those  
135 requiring hospital treatment. Cases detected on admission to hospital had a median reported symptom history  
136 of 7 days (interquartile range IQR 3-10, available for 385/483, 80%, of cases; Table S4).

137 New positive cases increased rapidly to a peak between March 31st and April 8th, before falling steadily  
138 through to the end of April (Figure 1). The number of daily new combined probable and definite nosocomial  
139 cases initially increased in line with community diagnoses, but peaked a week earlier than hospital SARS-CoV-  
140 2 admissions on March 23rd to a maximum of 12 new cases per day. Nosocomial cases then rapidly declined  
141 to low levels of 0-2 cases a day during April (Figure 1) and none in the following 4 months (data not shown).  
142 When the symptom onset date for community cases admitted to hospital is considered, the peak of symptom  
143 onset for community and nosocomial cases overlap (Supplemental Figure 1).

144 462 (80%) of the 574 SARS-CoV-2 positive patients were categorised based on NHS England and ECDC  
145 definitions (26) as community-onset, with 63 (11%) definite nosocomial, 27 (5%) probable nosocomial and 22  
146 (4%) indeterminate cases (see Methods). Demographics of each group are shown in Table 1. 323 (56%) were  
147 male and the median age was 61, although indeterminate, probable nosocomial, and definite nosocomial  
148 cases were older (73 years for each group) than community cases (58 years). 225 (49%) of the 455 patients  
149 having ethnicity recorded were of black and minority ethnicities (BAME). This proportion was higher amongst  
150 community cases (201/371, 54%), compared to indeterminate (6/12, 50%), probable (5/20, 25%) and definite  
151 nosocomial cases (13/52, 25%). Comorbidity was lower in community-onset cases 89 compared to probable  
152 and definite nosocomial cases (median Charlson score 2 (IQR 0-5) versus 5 (IQR 4-6) respectively). The  
153 overall crude in-hospital mortality was 20%, ranging from 17% for community-onset cases to 37% for definite  
154 nosocomial cases. Of the 574 cases diagnosed until March 31st, 541 were within the study period for genomic  
155 analysis between March 13th and 31st. SARS-CoV-2 genome sequence was obtained from 370 of 541 (68%)  
156 cases, including 89% (80/90) of all probable and definite nosocomial cases and 72% (168/234) of cases placed  
157 into epidemiological clusters (Table S4, S7).

## 158 **Healthcare worker symptomatology and sero-conversion**

159 The cumulative number of HCWs reporting COVID-19 compatible symptoms and having documented  
160 seroconversion from a cohort of 228 HCWs is shown in Figure 1. 43/228 (19%) seroconverted to SARS-CoV-  
161 2 IgG, with 44% (19/43) having done so by their first follow-up (April 10th) and 95% (41/43) by May 1st (Table  
162 S2). Of note 13/43 (30%) were asymptomatic. Figure 1 presents the predicted period of peak HCW  
163 infectiousness based on a combination of  $\pm 2$  days from date of symptom onset (n=30) or seroconversion  
164 data where symptoms were not present (n=13). The rapid rise in HCW infection is predicted to have been  
165 between March 16th and 25th overlapping with similar rapid rises in community cases reported elsewhere (3),  
166 and both symptom reporting by our community-onset cases and incidence of nosocomial cases.

## 167 **Linking epidemiology and genomics to define transmission clusters**

168 Strict epidemiological criteria were used to place patients into clusters based on having at least one overlapping  
169 time-point in the same ward, outpatient setting, care home or dialysis facility during 14 days prior to their  
170 positive sample (Figure 2a). Each cluster had to include a nosocomial case. This identified 44 epidemiological  
171 clusters involving 234 cases comprising 123 community admissions, 89 nosocomial acquisitions (62 definite,  
172 27 probable) and 22 indeterminate cases, with a median of 6 patients per cluster (range 2 - 21) (Table S6;  
173 Figure 2c for clusters 4-33). Viral genomic haplotype information for each case was then used to resolve the  
174 44 epidemiological clusters to create 'combined' final epidemiological and genetic clusters. In combined  
175 clusters the majority of all patient haplotypes must be identical, and no patient's viral haplotype can differ from  
176 the main cluster haplotype by more than 1 SNP (Figure 2a). This process resulted in 14 combined  
177 epidemiological and genetic clusters (Figure 2b, d). The combined clusters were then mapped onto the original  
178 44 clusters constructed from epidemiological data alone (Figure 2c, Table S8), where each patient in an  
179 epidemiological cluster is classified as either belonging to a combined cluster (coloured bar), or having a  
180 haplotype that was not in any combined cluster (grey) or without viral sequence (black).

181 In this manner, 31/44 (70%) epidemiological clusters, including some of the largest, did not have genetic  
182 support as they did not have even two cases belonging to any combined cluster (Figure 2c, Table S7). 13/44  
183 (30%) included at least one case from two or more combined clusters, indicating cases from multiple  
184 contemporaneous outbreaks harboured within an epidemiological cluster (Figure 2c, Table S7).

## 185 **Cluster spatial distribution and enrichment**

186 Of the 14 combined epidemiological and genetic clusters, 5 were on the acute admitting hospital site, 7 were



187 on the elective hospital site and two at intermediate care facilities. These 14 clusters contained 63/80 (79%)  
188 of all sequenced probable and definite nosocomial cases (Figure 2d). 3/5 (60%) clusters on the acute site  
189 (STH) included a community-onset or indeterminate case, which plausibly served as the originator of SARS-  
190 CoV-2 outbreak. This contrasts with the 9 clusters on elective and intermediate sites, which by policy did not  
191 knowingly admit COVID-19 patients, where only three (3/9, 33%) included a community-onset or indeterminate  
192 case that could have plausibly originated the outbreak (Figure 2d; Supplemental Figure 2 for ward movements).  
193 The validity of creating these final 14 clusters was supported by comparing their lineage enrichment compared  
194 to community sequences reported to COG-UK consortium CLIMB database during the study period (27).  
195 Clusters were enriched by between 1 (for the smallest clusters) and 14-fold (median 4-fold) (Figure 2d, Table  
196 S7). In terms of spatial distribution, 7/12 hospital clusters were contained within single wards, 3 clusters were  
197 spread on two wards (in 2 cases this involved adjacent wards), and 2 clusters were spread across more than  
198 two wards (Figure 4).

#### 199 **Unsequenced community-onset cases are unlikely to be originators of clusters**

200 We assessed the likelihood that unsequenced community-onset cases may have served as the originator of  
201 clusters, where no community-onset or indeterminate cases could be found, by reviewing cases  
202 epidemiologically linked with nosocomial clusters. We excluded cases as potential originators if i) they were  
203 diagnosed after the first nosocomial case, or ii) available sequence did not meet cluster inclusion criteria (i.e  
204 differed from main cluster viral haplotype by >1 SNP), or iii) if they were not community-onset or indeterminate  
205 cases (Table S11). Of all the clusters without originators, only 2 clusters could have potentially been originated  
206 by an unsequenced community-onset case with epidemiological linkage (case 50 or case 187 for GUY4; case  
207 62 for GUY5).

#### 208 **Deducing Transmission Networks and Estimating Incubation Period**

209 Patient movements, timing of positive SARS-CoV-2 test, viral haplotype data and SNP acquisition were  
210 combined and analysed to infer the place and time period of SARS-CoV-2 acquisition, and predict the direction  
211 of transmission from donor to recipient. This analysis could be applied to 5 hospital clusters comprising 24  
212 patients (Figure 5, Supplemental Figure S 3A-D, Table S9 and S10) with patients assigned a lower bound  
213 (n=12) and/or upper bound (n=23) for acquisition of SARS-CoV-2, and hence their incubation period (Figure  
214 5a,b,c). The aggregate analyses gave a median lower bound of 6 days and median upper bound of 9 days  
215 (Figure 5d, Supplemental Figure 3 A-D, Table S10), consistent with estimates that range from 2-14 days with  
216 a median estimate of 5-7 days (28).

217 **Representation of healthcare workers in transmission networks**

218 HCW were required to self isolate immediately upon developing COVID-19 compatible symptoms and were  
219 not routinely offered SARS-CoV-2 RNA testing. For this reason there are only 20 SARS-CoV-2 sequences  
220 from HCW in the dataset. 17 did not share genomic similarity with other cases, which excludes them from  
221 contributing to transmission within sequenced clusters. The viral haplotypes from 3 HCW shared genetic  
222 similarity with cluster cases, 1 of which (case 280) cared for a nosocomial case (case 60) within cluster STH1  
223 and shared the same haplotype. Case 280 therefore can be added to cluster STH1, however 280 is unlikely  
224 to be the originator of this cluster as they were diagnosed more than 7 days after the first case in this cluster.

225

226

## 227 **DISCUSSION**

228 This combined epidemiological and genomic analysis spans 19 days of intense community transmission in  
229 London during the first wave of the pandemic, which coincided with the main period of nosocomial  
230 transmission, comprising 90 definite or probable nosocomial cases across our healthcare institution. This was  
231 also the period when stepwise increases in public health restrictions were introduced, including repeated  
232 instructions to stay at home and socially distance by at least 2 metres in public places from 16th March, through  
233 to national lockdown on March 23rd.

234 Our transmission analysis during this important period provides evidence informing methodological  
235 approaches to nosocomial SARS-CoV-2 outbreak detection. First, both epidemiological and genomic  
236 information is essential for accurate linkage of nosocomial cases into putative SARS-CoV-2 clusters: we could  
237 not find genomic support for over half of the transmission clusters discovered using epidemiological data alone,  
238 and the rest are significantly reduced in size (Fig 3c, Table S7, S8). This latter point is illustrated by  
239 epidemiological cluster 8, where genome sequence identified the presence of 3 genomic clusters within a  
240 single epidemiologically defined cluster. Second, we show that isolates with a single SNP difference can  
241 reasonably be included within clusters given the known SARS-CoV-2 mutation rate and the timeframe of  
242 nosocomial transmission clusters. These single SNPs were highly informative as they helped determine the  
243 sequence of transmission (Figure 5, Supplemental Figure 3 A-D). Third, it is important to assess the likelihood  
244 that linked nosocomial cases even with identical genomes might be due to chance due to the high prevalence  
245 of that sequence in the community. We included a method to assess enrichment compared with the  
246 surrounding London population by comparing data from the COG-UK CLIMB database, which showed cluster  
247 enrichment ranging from 1 to 14 fold. Importantly, the lowest enrichment was seen for clusters of size 2 (Figure  
248 2d). For cases where the enrichment is over 1, this approach gives greater confidence in the definition of  
249 clusters and is an important measure that has not thus far been used in other genetic studies. Fourth, we show  
250 that for SARS-CoV-2, given its relatively long incubation time, patients should be considered in clusters based  
251 on contact during previous admissions. Five patients across 3 clusters (case 520, 362, 236 in STH1, 278 in  
252 STH3 and 277 in GUY1, see Supplementary Figure 1) had epidemiological contact during a previous  
253 admission to the one during which they were diagnosed. Such contact is not currently considered in published  
254 definitions. Finally, we were also able to robustly estimate median incubation period for nosocomial cases as  
255 between 6-9 days, which, to our knowledge, is the first time the COVID-19 incubation period has been  
256 estimated using both genetics and epidemiological data. This is consistent with published evidence that most  
257 people become symptomatic within 7 days of exposure (13). In addition, our study showed a similar proportion

258 of probable and definite nosocomial cases could be placed into transmission clusters. Thus when a probable  
259 nosocomial case is found it is likely to be a genuine nosocomial case and should be treated as such.

260 A number of clusters (GUY1, GUY2, GUY4, GUY5) involved cryptic transmission across multiple wards which  
261 is consistent with untested individuals such as staff or asymptomatic patients, but not patient visitors, as  
262 missing links in transmission clusters. For instance, clusters GUY1 and GUY2 involved 4 wards, with an  
263 identical viral haplotype circulating with high enrichment compared to the community. Whilst these two clusters  
264 meet our cluster definition as defined in Methods, they are not merged due to there being no patient overlap  
265 in ward stay between the clusters. Given these were highly enriched clusters, in the same building just a few  
266 floors apart, and with no community-onset case as the originator of GUY2, the most parsimonious explanation  
267 is cryptic transmission between the two. Similarly in GUY1 there is no patient who clearly could have infected  
268 case #551 (see Supplementary Figure 1). Lastly, GUY4 and GUY5 involve highly enriched haplotypes across  
269 neighbouring wards. These situations suggest cryptic transmission, and 'missing links' which may be HCW or  
270 asymptomatic, untested patients.

271 With the above methodological approaches defined, we focussed on the initial period of nosocomial SARS-  
272 CoV-2 transmission to try and identify factors explaining its rapid rise and fall. There was initially a complete  
273 temporal overlap between the increase in community cases, healthcare worker symptoms, and incidence of  
274 nosocomial cases. We propose that the most likely explanation is that HCWs were an essential contributor to  
275 the intensity of nosocomial transmission during this initial period, potentially by both initiating and sustaining  
276 transmission. This is supported by a number of findings. First, reported symptoms in HCW with confirmed  
277 infection were before or at the time of lockdown on 23rd March, with their peak infectivity predicted to coincide  
278 with peak nosocomial transmission (Figure 1). Second, cryptic transmission between wards was clearly  
279 demonstrated, suggesting involvement of untested individuals moving between wards, with HCWs being the  
280 most likely vector. Third, we were unable to identify community or indeterminate cases who may have served  
281 as originators for more than half of clusters, suggesting involvement of untested individuals such as HCW.  
282 Indeed many clusters also occurred on the elective sites, where cases were not knowingly admitted. Finally,  
283 we did link 1 of only 20 tested HCWs to a transmission cluster, which although not the originator, is consistent  
284 with the potential for HCWs to sustain outbreaks. Whilst HCW seem the most likely source of transmission it  
285 is however possible that unrecognised patient-to-patient transmission occurred, for instance by asymptomatic  
286 patients or in areas where we do not have epidemiological data, such as radiology departments

287 Subsequently, from around March 16th, progressive CSD rapidly reduced community SARS-CoV-2

288 transmission, which would also decrease the incidence of HCWs infected in the community, lowering their  
289 potential to contribute to nosocomial transmission. Consistent with this conclusion, nosocomial infection fell  
290 rapidly from March 23rd to the end of the study in line with reported community infections, and before any  
291 potential impact from surgical mask use or banning of visitors to hospital.

292 It is harder to interpret events after 31st March. It is notable that SARS-CoV-2 patients continued to be  
293 admitted, peaking on 8th April, whilst nosocomial cases fell and remained low. One conclusion is that  
294 admission of community-onset cases is in itself unlikely to cause large clusters. Partly this may be due to rapid  
295 diagnosis of clinically suspected cases and pre-emptive isolation, in an environment where HCWs are wearing  
296 appropriate PPE. Additionally, It may be that by the time community-onset cases of SARS-CoV-2 are admitted  
297 to hospital (in our study a median day 7 days post onset of symptoms) they are less infectious because viral  
298 load is falling. Indeed, this is consistent with previous studies showing a median duration of viral shedding of  
299 4 days post onset of symptoms (29).

300 In summary, this study supports routine use of genome sequencing for SARS-CoV-2 outbreak investigation  
301 and provides a framework for data interpretation that calls into question continued reliance on using  
302 epidemiology alone. A multi-site clinical trial, COG-UK HOCl, is currently investigating whether provision of  
303 real-time sequencing for outbreak analysis can help infection control teams interrupt transmission (30). We  
304 provide data supporting a conclusion that HCWs infected in the community are a major contributor to  
305 nosocomial transmission during the initial stage of the first wave of the pandemic, which was halted by  
306 implementation of CSD policies. With community transmission returning, including to HCWs, there will be an  
307 opportunity to assess whether nosocomial transmission returns to the same intensity with policies such as  
308 universal mask use in place, or whether additional interventions such as regular staff testing or rapid SARS-  
309 CoV-2 genome sequencing is required to limit nosocomial transmission. This is particularly important given  
310 the challenges re-introducing CSD policies and the need to continue with non-COVID-19 clinical activity.

311

312

## 313 **METHODS**

### 314 Setting

315 Guy's and St Thomas' Hospital NHS Foundation Trust includes: 1) an acute admitting adult hospital site with  
316 an Emergency Department (St Thomas') also hosting the network lead centre for nationally-commissioned  
317 respiratory high consequence infectious diseases (HCID), which admitted some of the first UK SARS-CoV-2  
318 cases to specialised intensive care and general wards. It was also the only site knowingly admitting COVID-  
319 19 patients. 2) an elective ambulatory site including elective orthopaedic and thoracic surgery, a cancer centre,  
320 dialysis and renal transplant unit (Guy's); 3) two long stay community care units and 4) multiple community  
321 dialysis units. All sites are part of the same management structure and were part of a single operational  
322 pandemic response structure with daily meetings throughout and received the same laboratory diagnostic and  
323 infection control services. Infection control policies were reviewed daily with reference to frequent updates from  
324 Public Health England and NHS England, to implement stepwise measured derogation of Personal Protective  
325 Equipment (PPE) use while caring for known and suspected COVID-19 patients moving from HCID designation  
326 to caring for hundreds of COVID-19 patients. Hospital visitors and relatives were excluded from the hospital  
327 from March 25th, and universal HCW surgical mask use policy was introduced for all patient interactions across  
328 all hospital and community facilities on March 28th.

329

### 330 Sample retrieval and clinical data collection

331 490 surplus RNA extracts from SARS-CoV-2 combined nose and throat swabs collected between 13th and  
332 31st March 2020 inclusive, predominantly from patients within the catchment South East London boroughs,  
333 and stored in the routine diagnostic laboratory after completion of all clinically-requested tests, were retrieved  
334 by the primary care team. Swabs had been tested using multiplexed tandem PCR (AusDiagnostics two-step  
335 multiplexed-tandem (MT-PCR) Coronavirus Typing Eight-well Panel; cat. no. 2061901) targeting ORF1a of  
336 SARS-CoV-2. 448 extracts had been reported as SARS-CoV2 detected and 42 not-detected. The cycle  
337 threshold (Ct) value was taken as 15 plus the diagnostic MT-PCR take off value. Isolates with a Ct of 16 – 37  
338 were regarded as eligible for WGS. Extracts were anonymised and linked with a limited set of clinical data  
339 (Table 1) and the admission and ward stay dates by the primary care team, before submission to the research  
340 team. Favourable opinion to conduct this work was granted by the North West Preston Research Ethics  
341 Committee (Reference 18/NW/0584).

342

343 Anonymisation

344 All patients and samples were anonymised using a unique patient and sample identification number. Ward  
345 stays were anonymised using the following schema: locations beginning with 'A' represent ambulatory or  
346 outpatient locations numbered A01 to A60; if prefixed with 'ED' represent emergency departments; if starting  
347 with 'IC' represent an intensive care unit; each patients usual residence was named 'Home' followed by their  
348 anonymised patient ID, and inpatient wards were anonymised using three letter international airport codes.

349

350 COVID-19 Whole Genome Sequencing

351 SARS-CoV-2 positive RNA isolates were processed as described in pcr-tiling-ncov-  
352 PTC\_9096\_v109\_revF\_06Feb2020-gridion from Oxford Nanopore Technologies (ONT) with V3 PCR primers  
353 from the ARTIC protocol (31). 24 samples were prepared in each library. 3µl of synthesised cDNA was used  
354 in each PCR reaction instead of the ONT suggested 2.5µl and 35 PCR cycles were conducted. The 20°C  
355 incubation was extended to 10 minutes in the end-prep step. All the AMPure XP bead clean-up steps used a  
356 1:1 ratio of library to AMPureXP beads. The post-barcode ligation bead clean-up was washed with 2x 450µl  
357 SFB washes rather than the ONT suggested 700µl. 17.5ng of the final library was loaded onto the flow cell for  
358 sequencing. The flow cell sequenced for 3 days or until there were very few active pores remaining.

359 Generation of SARS-CoV-2 consensus sequence and variant and lineage calling from raw Nanopore reads

360 From raw Nanopore reads, COVID-19 viral consensus sequences and variants were generated using the Artic  
361 bioinformatic pipeline v 1.0 as described in Artic Network(32) . Lineages were assigned using the Pangolin  
362 software (33) version 1.1.14 with lineages version 2020-05-19.

363 Haplotype construction for patients

364 For each patient, a viral haplotype was constructed by juxtaposing all variants from the .pass.vcf file output by  
365 the Artic bioinformatics pipeline above. The exception was for genomic positions that were known to be  
366 homoplasic according to problematic sites ([https://raw.githubusercontent.com/W-L/ProblematicSites\\_SARS-  
367 CoV-2/master/problematic\\_sites\\_sarsCov2.vcf](https://raw.githubusercontent.com/W-L/ProblematicSites_SARS-CoV-2/master/problematic_sites_sarsCov2.vcf)) . These sites at positions 635, 11074, 11083, 16887, 21575,  
368 were all masked and not included in any haplotypes.

369 For patient 363, three variants (C3096T, G13627T, C15540T) were also taken from the .fail.vcf file. This patient  
370 was in a transmission cluster with strong epidemiological evidence linking them to 4 patients who all had  
371 variants C3096T, G13627T, and C15540T. All three of these variants were found in all of the other patients in  
372 this transmission cluster. This situation with variants in the .fail.vcf file rather than the .pass.vcf file only arose  
373 for patient 363 in our dataset.

#### 374 Definitions and deduction of transmission Clusters

375 Transmission clusters were deduced in a series of stages using combined epidemiological and genetic  
376 information, in three phases as follows. First, each patient sample was placed in nosocomial categories based  
377 on date of testing according to NHS England and ECDC definitions (26): Community (<3 days from admission),  
378 indeterminate (3-7 days from admission), probable Nosocomial (8-14 days from admission) and definite  
379 nosocomial (>14 days from admission). Epidemiological clusters were constructed using the following rules  
380 (Fig 2a and table S7): At least two cases in the epidemiologically defined cluster; at least one probable or  
381 definite nosocomial case; all cases in the seed cluster must overlap with at least one other patient in the same  
382 seed cluster. Overlap was defined as both patients being on the same ward at the same time for at least one  
383 day during the incubation period set as 14 days prior to the positive SARS-CoV-2 positive swab (13).

384 In the second phase of cluster construction, genetic information was added by considering the viral haplotype  
385 for each patient in the epidemiological cluster. Epidemiological clusters were split into combined  
386 epidemiological + genetic clusters where every patient has the same viral haplotype. These combined  
387 epidemiological plus genetic clusters are termed “seed” clusters.

388 In the third phase, additional patients were added to seed clusters based on the following criteria: the patient  
389 added must overlap with at least one patient in the seed cluster (where overlap is defined as above); the added  
390 patient has a viral haplotype that differs only one SNP from the seed cluster viral haplotype. Patients who met  
391 criterion 1 (overlap) but whose viral haplotypes differed by 2 SNPs from the seed cluster viral haplotype were  
392 added to the cluster if at least one of the “missing” SNP positions was called as an N due to insufficient  
393 sequence coverage in consensus sequence generation. For two clusters, (STH4, STH5) phase 3 involved  
394 merging two different seed clusters whose viral haplotypes differed from each other by one SNP.

395 There are two clusters that are exceptions to the above rules: GUY3 and GUY4. These two clusters were  
396 added upon manual inspection of the combined epidemiological and genetic data. In both cases, two patients  
397 whose viral haplotype differed by a single SNP overlapped on the same ward during their incubation period,



398 and a third patient, whose viral haplotype was identical to that of one of the two previously mentioned patients  
399 was present on an adjacent ward at the same time, also during their incubation period. These two clusters  
400 violate the criterion given above that seed clusters should be on a single ward, but are nonetheless considered  
401 as transmission clusters because the two wards (Samaritan and Hedley Atkins) in both cases are spatially  
402 adjacent and with frequent sharing of staff across wards, especially at night..These clusters also showed high  
403 enrichment compared to community haplotypes (see below.)

#### 404 Calculation of Hospital compared with Community Enrichment for cluster viral haplotypes

405 Enrichment of viral haplotype frequencies amongst nosocomial and community cases were calculated as  
406 follows (Table S8 and Fig 2). For a given haplotype, the hospital frequency (H) was calculated by dividing the  
407 number of patients in the dataset by the total number of sequenced patients in our dataset (370). COG-UK  
408 consortium data in COV\_GLUE was extracted on 29th June 2020 to assess community haplotype frequencies  
409 (27). To assist with SQL queries, a view from several tables was created with the following SQL query:

```
410 "create table full as select m.id as sequence_id,m.collection_date as  
411 collection_date,adm0,adm1,adm2,num_ns,longest_n_run,num_unique_snps,pang_lineage,cov_glue_lineag  
412 e,cov_nt_mutation_id as mut_id from cov_coguk_metadata m join cov_sequence s join  
413 cov_cov_nt_mutation_sequence ms on m.id = sequence_id and ms.sequence_sequence_id = sequence_id ;"
```

414 Two numbers were used to calculate the community frequency,: the entire community population of relevance,  
415 and the number of patients with the given haplotype in the community population. The community population  
416 (Cd) was defined as all the sequenced patients within the study period (13th to 31st March inclusive) with a  
417 location of 'GREATER LONDON', 'LONDON', or 'CITY OF LONDON', whichever had greater than 90%  
418 sequence coverage (952 people). This number was obtained using the following SQL query:

```
419 "select count(distinct sequence_id) from full where (adm2 like '%LONDON%' and adm2 != 'LONDONDERRY')  
420 and (collection_date >= '2020-03-13' and collection_date <= '2020-03-31') and num_ns/29401 < 10;"
```

421 Where 29401 is the length of the reference viral genome coding region, so given the percentage of Ns in the  
422 sequenced sample. Requiring a cutoff of less than 10% Ns is equivalent to greater than 90% sequencing  
423 coverage, which is the cutoff required for our samples in this study.

424 The number of patients with the given haplotype in the community population was calculated by determining  
425 the number of sequences in the community population that had all of the SNP variants in the given haplotype,

426 and no more. For this purpose, any homoplasic SNPs that had been removed from consideration when  
427 constructing patient viral haplotypes within our study population (see section “*Haplotype construction for*  
428 *patients*” above), namely SNPs at positions 635, 11074, 11083, 16887, 21575, were added back to calculate  
429 the haplotype numbers in the community, as these SNPs had not been removed in the samples submitted to  
430 COG-UK. The following is an example query to obtain the number of patients in the community with the  
431 haplotype for our cluster STH1 (C241T,C3037T,C14408T,A23403G,C25350T):

```
432 “select distinct sequence_id from full where 100*(num_Ns/29903) < 10 and sequence_id in (select  
433 sequence_id from full where collection_date >= '2020-03-13' and collection_date <= '2020-03-31' and mut_id  
434 = 'C3037T' ) and sequence_id in (select sequence_id from full where collection_date >= '2020-03-13' and  
435 collection_date <= '2020-03-31' and mut_id = 'C14408T' ) and sequence_id in (select sequence_id from full  
436 where collection_date >= '2020-03-13' and collection_date <= '2020-03-31' and mut_id = 'A23403G' ) and  
437 sequence_id in (select sequence_id from full where collection_date >= '2020-03-13' and collection_date <=  
438 '2020-03-31' and mut_id = 'C25350T' ) and (adm2 like '%LONDON%' and adm2 != 'LONDONDERRY') group  
439 by sequence_id having count(distinct mut_id) = 4”
```

440 Results were obtained for 11 community sequences where community frequency was defined as  $C_n / C_d$ . A  
441 correction factor of 1 was then added to  $C_n$  as a pseudocount to avoid dividing by zero for cases where  $C_n =$   
442 0. Thus the formula for community frequency is  $(C_n + 1) / C_d$  and the formula to calculate nosocomial  
443 enrichment for a given haplotype was  $H / [(C_n + 1) / C_d]$ .

#### 444 *Healthcare worker (HCW) serology and symptom reporting*

445 Blood sample collection to determine COVID-19 seroconversion was offered to consenting healthcare workers  
446 at Guy’s & St Thomas’ Hospital after expedited approval from the Trust’s R&D office, occupational health and  
447 medical director ((34)). Sequential serum samples were collected approximately every 1-2 weeks from 228  
448 HCWs between 13<sup>th</sup> March and 10<sup>th</sup> June 2020. Samples were tested using a published ELISA assay with  
449 sera diluted 1:50 considered positive if they gave an OD for IgG against both N and S that was 4-fold above  
450 the negative control sera. Self-reported COVID-19 related symptoms were recorded by participants and days  
451 post onset of symptoms in seropositive individuals was determined using this information. For asymptomatic  
452 seropositive individuals, days POS was defined as the first timepoint SARS-CoV-2 Abs were detected. Six  
453 HCWs had a confirmed SARS-CoV-2 PCR+ infection. Serology results were communicated individually to  
454 HCWs and collectively to the hospital as part of preparation for universal HCW serology testing that  
455 commenced in May 2020.

456 **FIGURE and TABLE LEGENDS**

457 **FIGURE 1** Epidemiological description of cases diagnosed during the first wave. On the left hand y-axis , the  
458 grey bar chart displays new cases over time between March 10th and April 31st. Over the same period the  
459 right hand y axis shows incidence of nosocomial cases (orange line) and, the proportion (%) of screened HCW  
460 with confirmed infection reporting symptom onset (black line) with peak period of infectivity  $\pm$  2 days (dashed  
461 black line), with IgG seroprevalence of HCW (green). Overlaid is 5 key dates in public policy and infection  
462 control (A) March 13th; testing recommended for all inpatients with cough and fever. (B) March 16th; strong  
463 government advice for social distancing; (C) March 23rd; implementation of national lockdown (D) March 25th;  
464 exclusion of hospital visitors (E) March 28th; mandatory use of surgical masks for all patient interactions under  
465 2 metres.

466

467 **FIGURE 2a** i) Potential incubation period for a patient is defined as the time from 14 days prior to sample  
468 collection up to sample collection.

469 ii) An overlap between two patients (circles with numbers indicating different patients) is defined as two patients  
470 who stay on the same ward at the same time, both during their potential incubation period (red circles). The  
471 following scenarios are not considered to be overlap: one patient is not in their potential incubation period (grey  
472 circle); two potentially incubating patients are on two different wards at the same time; two potentially  
473 incubating patients are on the same ward at two non-overlapping times (i.e. different days).

474 iii) An epidemiological (epi) cluster is defined as a set of overlapping patients based on ward stays, where  
475 overlap is defined as above, and every patient in the set overlaps at least one other patient in the set, and at  
476 least one patient in the set is nosocomial (in hospital >7 days before tested for COVID-19 after having shown  
477 symptoms). When viral haplotypes information is taken into account for the patients in a single epi cluster,  
478 there are two possible results. In scenario 1, the epi cluster is decomposed into several epi + genetic clusters  
479 (indicated by non-red colours) where different colours mean different haplotypes, and a star indicates that a  
480 patient has a single additional genetic variant (at most) in addition to the variants comprising the coloured  
481 haplotype. In scenario 2, the addition of genetic information decomposes the single epidemiological cluster  
482 into individual patients with unique haplotypes, not clustering by genomics.

483 iv) Individual epidemiological plus genomics clusters from different wards are merged if they share at least one  
484 patient, and every patient in the resulting merged cluster has at most one SNP difference from the main cluster

485 haplotype.

486 **FIGURE 2b)** Haplotype representations of the fourteen clusters that emerge after applying the process  
487 depicted in part a) to epidemiological and viral genetic data (see Methods). Clusters are named after the  
488 hospital site they occur in (leftmost column). Cluster haplotype lineages are shown in black (second column  
489 from left). Cluster haplotypes are depicted (rightmost column) with a "1" in a given position indicating the  
490 presence of the SNP relative to the reference genome shown above in vertical text, and a "." indicating its  
491 absence (wild-type sequence). Cluster rows are coloured based loosely on the similarity of the cluster  
492 haplotypes to one another. This same colour scheme is used to represent specific clusters in subsequent  
493 figures.

494 **FIGURE 2c)** Epidemiological clusters 4-33, including cases where  $n > 2$  (Table S7) are coloured according to  
495 how many of their patients belong to a combined epidemiological plus genomics cluster, with the colour  
496 indicative of the viral haplotype (Figure 2b). Patients with viral haplotypes not found in any combined cluster  
497 are coloured grey, and those patients for which sequence was unavailable are shown in black. Epidemiological  
498 cluster number is shown on the x-axis. Epidemiological cluster 1 -3 are not displayed due to their large size.

499 **FIGURE 2d)** Combined epidemiological plus genomic clusters from the acute and elective hospital sites.  
500 Clusters are coloured according to viral genomic haplotype (Figure 2b). Clusters are shown broken down into  
501 PHE patient nosocomial categories, with different shapes indicating the different categories. Enrichment of the  
502 cluster viral haplotype frequency in our study dataset vs. the frequency in the community (Table S8, Methods)  
503 is shown on top of each cluster column.

504

505 **FIGURE 3** - Pictorial representation of ward stays and movements for patients within cluster GUY1. Each row  
506 represents a different case. Patient ID, designation, lineage and SNP variants are marked. Ward movements  
507 between March 1st to 31st are displayed. Different wards are by given colours. Where there is  $>1$  ward stay  
508 on one day, the longest ward stay is represented. The sample collection date is marked with an 'x'. Time  
509 periods outside of the acquisition period are shaded.

510

511 **FIGURE 4)** 3D spatial representation of St. Thomas' Hospital **(a)** and Guy's Hospital **(b)** is shown with wards  
512 where transmission of clusters STH1-5 and GUY1-7 occurred (Table S10) are coloured according to viral

513 genetic haplotype (Figure 2b). The numbers in the ward indicate the number of patients from the given cluster  
514 inside that ward during their incubation period (as defined in Figure 2a).

515

516 **FIGURE 5a)** Patient movement diagram and inferred transmission network for cluster STH3. Patient  
517 movements from home to hospital and between wards within St. Thomas' Hospital are shown from the 8th to  
518 the 25th of March. Shapes indicate the nosocomial designation assigned to the patient as in Figure 2 (d).  
519 Patients are coloured according to viral haplotype (Figure 2b) from the earliest date at which it can be deduced  
520 that they could have caught COVID-19 onwards, based on the viral haplotype and the movement of other  
521 patients within the cluster. Prior to the inferred earliest possible infection start date they are shown as white  
522 shapes. Double-sided arrows indicate a patient staying on a ward for several days. Patients 16 and 29 originate  
523 the cluster, arriving from home sites within 1km of each other on the 8th and 9th, into Ward A (LON), where  
524 they transmit the same viral haplotype to patients 90 and 144. Patient 90 is then moved to Ward B (INV) on  
525 the 11th, which leads to the infection of patients 230 and 319, and in the process an accumulation of an extra  
526 SNP in the viral haplotype (pink asterisk, A11781G). Patient 278 is infected with this new viral haplotype  
527 sometime between the 16th and 18th, when they are on ward B. Patient 278 went back and forth between  
528 home and the hospital several times, so while strictly designated as "Community", likely caught this rare  
529 hospital-enriched SARS-CoV-2 haplotype in Ward B.

530

531 **FIGURE 5b)** Inferred transmission network. The most parsimonious COVID-19 transmission network for this  
532 cluster based on patient ward movements and viral haplotypes is shown. The pink asterisk indicates the  
533 mutation of the original haplotype via the acquisition of an additional SNP A11781G.

534 **FIGURE 5c)** Inferred lower and upper incubation period bounds for selected patients from cluster STH4. Based  
535 on the patient ward movements (part a) and the transmission network (part b), the lower and upper bounds of  
536 when certain patients must have contracted SARS-CoV-2 are indicated by coloured squares, with days prior  
537 to SARS-CoV-2 test (indicated with an "X") shown as negative integers.

538 **FIGURE 5d)** Aggregate boxplots of lower and upper bounds for incubation period for all patients for which the  
539 types of deduction shown in parts c) are possible, for all combined epi + genetic clusters STH1-5, GUY1-7  
540 (Figure S2, Table S11). The number of patients for which the lower bound or upper bound inference was  
541 possible is indicated above each boxplot. The median number of days is indicated inside the boxplot for the

542 lower bound and the upper bound for the incubation period.

543

544 **TABLE 1** Demographics of the 574 cases diagnosed by the diagnostic lab until March 31st, separated by  
545 community-onset, indeterminate, probable nosocomial, and definite nosocomial infections.

546

#### 547 **SUPPLEMENTAL TABLE LEGENDS**

548 **SUPPLEMENTAL FIGURE 1** Epidemiological description of cases diagnosed during the first wave. On the left  
549 hand y-axis , the grey bar chart displays cumulative symptom onset for admitted cases where symptom onset  
550 is known, between March 10th and April 31st. Over the same period the right hand y axis shows incidence of  
551 nosocomial cases (orange line) and, the proportion of screened HCW with confirmed infection reporting  
552 symptom onset (olive line), and IgG seroprevalence of HCW (green).

553

554 **SUPPLEMENTAL FIGURE 2** Ward movement diagrams for the combined clusters formed through  
555 epidemiological and genetic analysis. Each row represents one patient's movements. Lineage, nosocomial  
556 designation and haplotype are shown. Ward stays are shown coloured by different ward location, with time on  
557 the horizontal axis. Where a patient is on two wards in one day, the ward with the longest stay is represented.  
558 An 'x' marks date of specimen collection for the first positive PCR test for SARS-CoV-2 for each patient.

559 **SUPPLEMENTAL FIGURES 3A - 3D** Patient movement and transmission network analogous to figure 5 a-c  
560 for clusters STH1 (Figure S 3A), STH4 (Figure S 3B), GUY1 (Figure S 3C), and GUY3 (Figure S 3D). Patient  
561 shapes are as specified for Figure 5. Colours are for cluster-specific viral haplotypes, as specified in Figure  
562 2b. Ward names are independent for each cluster (so "Ward A" on Figure S 3A is not necessarily the same as  
563 "Ward A" on Figure S 3B).

564 **SUPPLEMENTAL FIGURE 3A** Patient 127 is the likely origin of the part of cluster STH1 that is on Ward A  
565 (KUL ward from Table S5, Table S8). Patient 127 arrives from home to the ward where the nosocomial patients  
566 are infected (Ward A) within a two day period. Nosocomial patients 245, 206, 354, 293, and 480 are infected  
567 in Ward A after the arrival of patient 127 onto Ward A having already been on this ward before patient 127  
568 arrives (245,480, 293, 206) or arriving after patient 127 (354). Patients 245, 480, 293, and 206 are then

569 transferred to Ward C (SFO), which sets a lower bound on when they must have been infected (as they were  
570 infected in Ward A). Subsequently nosocomial patient 469 is infected on Ward C. Independently, patient 127  
571 is moved to Ward B (DEL), where patient 268 gets infected.

572 **SUPPLEMENTAL FIGURE 3B** Two transmission scenarios (i and ii) are considered for cluster STH4. Either  
573 patient 212 arrives on Ward A already a carrier, which leads to the infection of nosocomial patients 337, 396,  
574 351, and 374 (scenario "i"), or the viral haplotype was already circulating on Ward A (DEN) prior to the arrival  
575 of patient 212 (scenario "ii"). In scenario (i), patient 212 transmits the virus to one of patients 337, 396, or 351,  
576 and in this transmission, SNP A12918 (purple asterisk) is acquired. Subsequently patient 212 transmits the  
577 strain without A12918 to patient 374. In scenario (ii), when patient 212 arrives on Ward A, there are already  
578 two strains that differ by a single SNP (A12918 ) circulating on that ward. "X" and "Y" indicate two separate  
579 unknown "missing links" -- either asymptomatic patients or staff. For both scenarios i and ii, the inferred upper  
580 bounds for acquisition are identical for patients 374, 396, 351, shown in part c.

581 **SUPPLEMENTAL FIGURE 3C** Patient 277 originates cluster GUY1, arriving from home onto Ward A (PVG),  
582 where nosocomial patients 355 and 199 are infected. Nosocomial patient 309 is infected on Ward A, picking  
583 up the additional variant TTA28062T. Patient 355 is then transferred to Ward B (AMS), which leads to the  
584 infection of nosocomial patient 256 and patient 356. In an independent transmission network, nosocomial  
585 patient 434 is infected on Ward C (CAN) after the arrival of patient 551, and in the process acquires SNP  
586 T2978C.

587 **SUPPLEMENTAL FIGURE 3D** Patient 71 originates cluster GUY3, arriving from home onto Ward A (IC9),  
588 then moving to Ward B (HKG) within three days, where nosocomial patients 229, 295, and 363 are infected.  
589 All three of these patients acquire SNP A1678G in the process, so it is most parsimonious that patient 71  
590 transmitted to one of these patients, who then transmitted it to at least one of the other two. Several days later,  
591 patient 301 is admitted to Ward B, where they are infected, and acquire SNP A24033G in the process.

592

593 **SUPPLEMENTAL TABLE 1** Number of tests performed, number of positive tests, number of new cases,  
594 combined number of probable and definite nosocomial cases, and number of community viral sequences  
595 submitted to CLIMB, all by date from March 9th to March 31st.

596

597 **SUPPLEMENTAL TABLE 2** Cumulative incidence of HCW IgM and IgG seroconversion by week, beginning  
598 on Mar 13th until Jun 12th. Total number sampled (n=228)

599

600 **SUPPLEMENTAL TABLE 3** Genomic sequence of viral isolates from cases. Sequence only included if  
601 sequenced successfully with >90% coverage at 8x depth. GISAID accession ID, lineage, haplotype, coverage  
602 and N positions for each genomic sequence displayed.

603

604 **SUPPLEMENTAL TABLE 4** For each patient, symptom onset (column B), hospital admission or outpatient  
605 encounter date (column C) during which first positive SARS-CoV-2 samples is taken. Sample collection date  
606 and time (column D) is given, with time between symptom onset and admission (column E) or  
607 admission/encounter and sample collection date (column F). The admission/encounter is categorised (column  
608 G) as either 'outpatient', 'A&E' where samples are taken in the emergency room when the patient is not  
609 admitted, and 'Inpatient' where the patient is admitted during that encounter. Column H categorises patients  
610 as either as per the NHS England and ECDC definitions of nosocomial infection (26). Column I shows whether  
611 viral sequence for the isolate was successfully obtained..

612

613 **SUPPLEMENTAL TABLE 5:** Patient ward movements. Every encounter or ward stays in the 14 days prior to  
614 the first positive test is given, with start and end date. Each row represents a different encounter or ward stay.  
615 Ward stays are arranged by ascending patient number and in chronological order.

616

617 **SUPPLEMENTAL TABLE 6:** Epidemiological clusters with ward of overlaps and patients within the cluster.  
618 Clusters must contain at least one probable or nosocomial infection (see Methods). Sorted from largest cluster  
619 to smallest.

620

621 **SUPPLEMENTAL TABLE 7:** Epidemiological clusters separated into those that isolates that were not  
622 sequenced successfully, genetic haplotypes without genetic similarity to other sequenced individuals, and by



623 haplotypes that form clusters with other cases (GUY1 to GUY7, STH1 to STH5, MKH, PLR)

624

625 **SUPPLEMENTAL TABLE 8:** Final transmission clusters with associated hospital site, ward, ward type, lineage  
626 and case numbers. Overall number of each noscomail designation for the clusters is given in column G. Seed  
627 haplotype is given, with SNP variants from the seed haplotype also reported. The final three columns show  
628 the calculation of the hospital enrichment factor; the number of sequences with the seed haplotype from the  
629 sequenced isolates from hospital, the number of community samples with this haplotype submitted to CLIMB,  
630 and the enrichment factor which is the ratio of these two numbers.

631

632 **SUPPLEMENTAL TABLE 9:** Data used for Fig 3 -- number of patients on each ward for each cluster, for each  
633 ward with a provable transmission.

634

635 **SUPPLEMENTAL TABLE 10:** Lower and Upper bounds for the incubation period (days before onset of  
636 symptoms) for specific patients based on inferred transmission networks from Fig 5, Fig S2.

637

638 **SUPPLEMENTAL TABLE 11:** Epidemiological clusters that contribute to combined epi + genetic cluster  
639 without community-onset or indeterminate cases are assessed to see whether they could contain non-  
640 sequenced cases that may serve as originators to the cluster. Cases are deemed not to represent a potential  
641 non-sequenced originator if they are a probable or definite nosocomial case, diagnosed after the start of the  
642 cluster, or if they do not share significant genome similarity with other cases in the cluster. Epidemiological  
643 cluster information is used from Supplemental Table 7

644

645

646

647 **REFERENCES**

- 648 1. Zhou, P. *et al.* A pneumonia outbreak associated with a new coronavirus of probable bat origin. *Nature*  
649 **579**, 270–273 (2020).
- 650 2. John Hopkins University. COVID-19 map-Johns Hopkins Coronavirus Resource Center. (2020). at  
651 <<https://coronavirus.jhu.edu/map.html>>
- 652 3. Birrell, P., Blake, J. & van Leeuwen, E. COVID-19: nowcast and forecast. (2020). at  
653 <<https://joshuablake.github.io/public-RTM-reports/20200510.html>>
- 654 4. Coronavirus (COVID-19) in the UK. *GOV.uk* at <<https://coronavirus.data.gov.uk/healthcare>>
- 655 5. England, N. H. S. NHS England » NHS roadmap to safely bring back routine operations. at  
656 <<https://www.england.nhs.uk/2020/05/nhs-roadmap/>>
- 657 6. Rickman, H. M. *et al.* Nosocomial transmission of COVID-19: a retrospective study of 66 hospital-  
658 acquired cases in a London teaching hospital. *Clin. Infect. Dis.* (2020). doi:10.1093/cid/ciaa816
- 659 7. Taylor, J. *et al.* Nosocomial COVID-19: experience from a large acute NHS Trust in South-West London.  
660 *J. Hosp. Infect.* (2020). doi:10.1016/j.jhin.2020.08.018
- 661 8. Cao, G. *et al.* The potential transmission of SARS-CoV-2 from patients with negative RT-PCR swab  
662 tests to others: two related clusters of COVID-19 outbreak. *Jpn. J. Infect. Dis.* (2020).  
663 doi:10.7883/yoken.JJID.2020.165
- 664 9. Vanhems, P. Fast nosocomial spread of SARS-CoV2 in a French geriatric unit Lyon Study Group on  
665 Covid-19 infection. *Infect. Control Hosp. Epidemiol.* 1–4 (2020). doi:10.1017/ice.2020.99
- 666 10. Ji, H., Liu, L., Huang, T. & Zhu, Y. Nosocomial infections in psychiatric hospitals during the COVID-19  
667 outbreak. *Eur J Psychiatry* **34**, 177–179 (2020).
- 668 11. Edelstein, M. *et al.* SARS-CoV-2 infection in London, England: changes to community point prevalence  
669 around lockdown time, March-May 2020. *J. Epidemiol. Community Health* (2020). doi:10.1136/jech-  
670 2020-214730
- 671 12. Lauer, S. A. *et al.* The Incubation Period of Coronavirus Disease 2019 (COVID-19) From Publicly  
672 Reported Confirmed Cases: Estimation and Application. *Ann. Intern. Med.* **172**, 577–582 (2020).
- 673 13. Wiersinga, W. J., Rhodes, A., Cheng, A. C., Peacock, S. J. & Prescott, H. C. Pathophysiology,  
674 Transmission, Diagnosis, and Treatment of Coronavirus Disease 2019 (COVID-19): A Review. *JAMA*  
675 **324**, 782–793 (2020).
- 676 14. Meredith, L. W. *et al.* Rapid implementation of SARS-CoV-2 sequencing to investigate cases of health-  
677 care associated COVID-19: a prospective genomic surveillance study. *Lancet Infect. Dis.* (2020).

- 678 doi:10.1016/S1473-3099(20)30562-4
- 679 15. Lucey, M. *et al.* Whole-genome sequencing to track SARS-CoV-2 transmission in nosocomial outbreaks.  
680 *Clin. Infect. Dis.* (2020). doi:10.1093/cid/ciaa1433
- 681 16. van Dorp, L. *et al.* Emergence of genomic diversity and recurrent mutations in SARS-CoV-2. *Infect.*  
682 *Genet. Evol.* **83**, 104351 (2020).
- 683 17. Duchene, S. *et al.* Temporal signal and the phylodynamic threshold of SARS-CoV-2. *Virus Evol* (2020).  
684 doi:10.1093/ve/veaa061
- 685 18. Wang, D. *et al.* Clinical Characteristics of 138 Hospitalized Patients With 2019 Novel Coronavirus-  
686 Infected Pneumonia in Wuhan, China. *JAMA* **323**, 1061–1069 (2020).
- 687 19. Carter, B. *et al.* Nosocomial COVID-19 infection: examining the risk of mortality. The COPE-Nosocomial  
688 Study (COVID in Older PEople). *J. Hosp. Infect.* **106**, 376–384 (2020).
- 689 20. Scientific Advisory Group for Emergencies. Dynamic CO-CIN Report to SAGE and NERVTAG, 1 April  
690 2020. (2020). at <[https://www.gov.uk/government/publications/dynamic-co-cin-report-to-sage-and-](https://www.gov.uk/government/publications/dynamic-co-cin-report-to-sage-and-nervtag-1-april-2020)  
691 [nervtag-1-april-2020](https://www.gov.uk/government/publications/dynamic-co-cin-report-to-sage-and-nervtag-1-april-2020)>
- 692 21. Adam, D. C. *et al.* Clustering and superspreading potential of SARS-CoV-2 infections in Hong Kong.  
693 *Nat. Med.* (2020). doi:10.1038/s41591-020-1092-0
- 694 22. Disinfection of environments in healthcare and non-healthcare settings potentially contaminated with  
695 SARS-CoV-2. (2020). at <[https://www.ecdc.europa.eu/en/publications-data/disinfection-environments-](https://www.ecdc.europa.eu/en/publications-data/disinfection-environments-covid-19)  
696 [covid-19](https://www.ecdc.europa.eu/en/publications-data/disinfection-environments-covid-19)>
- 697 23. WHO. Transmission of SARS-CoV-2: implications for infection prevention precautions. at  
698 <[https://www.who.int/news-room/commentaries/detail/transmission-of-sars-cov-2-implications-for-](https://www.who.int/news-room/commentaries/detail/transmission-of-sars-cov-2-implications-for-infection-prevention-precautions)  
699 [infection-prevention-precautions](https://www.who.int/news-room/commentaries/detail/transmission-of-sars-cov-2-implications-for-infection-prevention-precautions)>
- 700 24. Houlihan, C. F. *et al.* Pandemic peak SARS-CoV-2 infection and seroconversion rates in London  
701 frontline health-care workers. *Lancet* **396**, e6–e7 (2020).
- 702 25. Shields, A. *et al.* SARS-CoV-2 seroprevalence and asymptomatic viral carriage in healthcare workers: a  
703 cross-sectional study. *Thorax* (2020). doi:10.1136/thoraxjnl-2020-215414
- 704 26. Surveillance definitions for COVID-19. at <[https://www.ecdc.europa.eu/en/covid-](https://www.ecdc.europa.eu/en/covid-19/surveillance/surveillance-definitions)  
705 [19/surveillance/surveillance-definitions](https://www.ecdc.europa.eu/en/covid-19/surveillance/surveillance-definitions)>
- 706 27. Nicholls, S. M. *et al.* MAJORA: Continuous integration supporting decentralised sequencing for SARS-  
707 CoV-2 genomic surveillance. *Cold Spring Harbor Laboratory* 2020.10.06.328328 (2020).  
708 doi:10.1101/2020.10.06.328328
- 709 28. McAloon, C. *et al.* Incubation period of COVID-19: a rapid systematic review and meta-analysis of

- 710 observational research. *BMJ Open* **10**, e039652 (2020).
- 711 29. Singanayagam, A. *et al.* Duration of infectiousness and correlation with RT-PCR cycle threshold values  
712 in cases of COVID-19, England, January to May 2020. *Euro Surveill.* **25**, (2020).
- 713 30. COG-UK Project Hospital-Onset COVID-19 Infections Study - Full Text View - ClinicalTrials.gov. at  
714 <<https://clinicaltrials.gov/ct2/show/NCT04405934>>
- 715 31. Quick, J. nCoV-2019 sequencing protocol v1 (protocols.io.bbmuik6w).  
716 doi:10.17504/protocols.io.bbmuik6w
- 717 32. Artic Network. at <<https://artic.network/ncov-2019/ncov2019-bioinformatics-sop.html>>
- 718 33. *pangolin*. (Github). at <<https://github.com/cov-lineages/pangolin>>
- 719 34. Seow, J. *et al.* Longitudinal observation and decline of neutralizing antibody responses in the three  
720 months following SARS-CoV-2 infection in humans. *Nat Microbiol* (2020). doi:10.1038/s41564-020-  
721 00813-8

722

723

724 **APPENDIX**

725 Funding acquisition, leadership, supervision, metadata curation, project administration, samples, logistics,

726 Sequencing, analysis, and Software and analysis tools:

727 Dr Thomas R Connor PhD33, 34 , and Professor Nicholas J Loman PhD15.

728

729 Leadership, supervision, sequencing, analysis, funding acquisition, metadata curation, project administration,

730 samples, logistics, and visualisation:

731 Dr Samuel C Robson Ph.D 68.

732

733 Leadership, supervision, project administration, visualisation, samples, logistics, metadata curation and

734 software and analysis tools:

735 Dr Tanya Golubchik PhD 27.

736

737 Leadership, supervision, metadata curation, project administration, samples, logistics sequencing and

738 analysis:\_\_\_\_\_

739 Dr M. Estee Torok FRCP 8, 10.

740

741 Project administration, metadata curation, samples, logistics, sequencing, analysis, and software and

742 analysis tools:\_\_\_\_\_

743 Dr William L Hamilton PhD 8, 10.

744

745 Leadership, supervision, samples logistics, project administration, funding acquisition sequencing and

746 analysis:

747 Dr David Bonsall PhD 27.

748

749 Leadership and supervision, sequencing, analysis, funding acquisition, visualisation and software and

750 analysis tools:

751 Dr Ali R Awan PhD 74.

752

753 Leadership and supervision, funding acquisition, sequencing, analysis, metadata curation, samples and

754 logistics:

755 Dr Sally Corden PhD 33 .

756

757 Leadership supervision, sequencing analysis, samples, logistics, and metadata curation:

758 Professor Ian Goodfellow PhD 11.

759

760 Leadership, supervision, sequencing, analysis, samples, logistics, and Project administration:

761 Professor Darren L Smith PhD 60, 61.

762

763 Project administration, metadata curation, samples, logistics, sequencing and analysis:

764 Dr Martin D Curran PhD 14, and Dr Surendra Parmar PhD 14.

765

766 Samples, logistics, metadata curation, project administration sequencing and analysis:

767 Dr James G Shepherd MBChB MRCP 21.

768

769 Sequencing, analysis, project administration, metadata curation and software and analysis tools:

770 Dr Matthew D Parker PhD 38 and Dr Dinesh Aggarwal MRCP 1, 2, 3.

771

772 Leadership, supervision, funding acquisition, samples, logistics, and metadata curation:

773 Dr Catherine Moore<sup>33</sup> .

774

775 Leadership, supervision, metadata curation, samples, logistics, sequencing and analysis:

776 Dr Derek J Fairley PhD 6, 88, Professor Matthew W Loose PhD 54, and Joanne Watkins MSc 33.

777

778 Metadata curation, sequencing, analysis, leadership, supervision and software and analysis tools:

779 Dr Matthew Bull PhD<sup>33</sup> , and Dr Sam Nicholls PhD 15 .

780

781 Leadership, supervision, visualisation, sequencing, analysis and software and analysis tools:

782 Professor David M Aanensen PhD 1, 30.

783

784 Sequencing, analysis, samples, logistics, metadata curation, and visualisation:

785 Dr Sharon Glaysher 70 .

786

787 Metadata curation, sequencing, analysis, visualisation, software and analysis tools:

788 Dr Matthew Bashton PhD 60, and Dr Nicole Pacchiarini PhD 33.

789

790 Sequencing, analysis, visualisation, metadata curation, and software and analysis tools:

791 Dr Anthony P Underwood PhD 1, 30.

792 \_\_\_\_\_

793 Funding acquisition, leadership, supervision and project administration:

794 Dr Thushan I de Silva PhD 38, and Dr Dennis Wang PhD 38.

795

796 Project administration, samples, logistics, leadership and supervision:

797 Dr Monique Andersson PhD 28 , Professor Anoop J Chauhan 70, Dr Mariateresa de Cesare PhD26, Dr

798 Catherine Ludden 1,3 , and Dr Tabitha W Mahungu FRCPATH 91.

799

800 Sequencing, analysis, project administration and metadata curation:

801 Dr Rebecca Dewar PhD 20, and Martin P McHugh MSc20.

802

803 Samples, logistics, metadata curation and project administration:

804 Dr Natasha G Jesudason MBChB MRCP FRCPATH 21, Dr Kathy K Li MBChB FRCPATH 21, Dr Rajiv N

805 Shah BMBS MRCP MSc 21, and Dr Yusri Taha MD, PhD 66.

806

807 Leadership, supervision, funding acquisition and metadata curation:

808 Dr Kate E Templeton PhD 20.

809

810 Leadership, supervision, funding acquisition, sequencing and analysis:

811 Dr Simon Cottrell PhD 33, Dr Justin O'Grady PhD 51, Professor Andrew Rambaut DPhil 19, and Professor

812 Colin P Smith PhD93.

813

814 Leadership, supervision, metadata curation , sequencing and analysis:

815 Professor Matthew T.G. Holden PhD 87, and Professor Emma C Thomson PhD/FRCP 21.



816

817 Leadership, supervision, samples, logistics and metadata curation:

818 Dr Samuel Moses MD 81, 82.

819

820 Sequencing, analysis, leadership, supervision, samples and logistics:

821 Dr Meera Chand 7, Dr Chrystala Constantinidou PhD 71, Professor Alistair C Darby PhD 46, Professor

822 Julian A Hiscox PhD 46, Professor Steve Paterson PhD 46, and Dr Meera Unnikrishnan PhD 71.

823

824 Sequencing, analysis, leadership and supervision and software and analysis tools:

825 Dr Andrew J Page PhD 51, and Dr Erik M Volz PhD96.

826

827 Samples, logistics, sequencing, analysis and metadata curation:

828 Dr Charlotte J Houldcroft PhD 8, Dr Aminu S Jahun PhD 11, Dr James P McKenna PhD 88, Dr Luke W

829 Meredith PhD 11, Dr Andrew Nelson PhD 61, Sarojini Pandey MSc 72, and Dr Gregory R Young PhD

830 60.

831

832 Sequencing, analysis, metadata curation, and software and analysis tools:

833 Dr Anna Price PhD34, Dr Sara Rey PhD 33, Dr Sunando Roy PhD 41, Dr Ben Temperton Ph.D 49, and

834 Matthew Wyles 38.

835

836 Sequencing, analysis, metadata curation and visualisation:

837 Stefan Rooke MSc19, and Dr Sharif Shaaban PhD87.

838

839 Visualisation, sequencing, analysis and software and analysis tools:

840 Dr Helen Adams PhD 35, Dr Yann Bourgeois Ph.D 69, Dr Katie F Loveson Ph.D 68, Áine O'Toole MSc19,  
841 and Richard Stark MSc 71.

842

843 Project administration, leadership and supervision:

844 Dr Ewan M Harrison PhD 1, 3, David Heyburn 33, and Professor Sharon J Peacock 2, 3

845

846 Project administration and funding acquisition:

847 Dr David Buck PhD26 , and Michaela John BSc Hons 36

848

849 Sequencing, analysis and project administration:

850 Dorota Jamrozy 1, and Dr Joshua Quick PhD 15

851

852 Samples, logistics, and project administration:

853 Dr Rahul Batra MD78, Katherine L Bellis BSc (Hons) 1, 3, Beth Blane BSc 3 , Sophia T Girgis MSc 3, Dr

854 Angie Green PhD 26, Anita Justice MSc 28 , Dr Mark Kristiansen PhD 41 , and Dr Rachel J Williams

855 PhD 41.

856

857 Project administration, software and analysis tools:

858 Radoslaw Poplawski BSc 15.

859

860 Project administration and visualisation:

861 Dr Garry P Scarlett Ph.D69.

862

863 Leadership, supervision, and funding acquisition:

864 Professor John A Todd PhD 26 , Dr Christophe Fraser PhD 27, Professor Judith Breuer MD 40,41,

865 Professor Sergi Castellano PhD 41, Dr Stephen L Michell PhD 49, Professor Dimitris Gramatopoulos

866 PhD, FRCPATH73, and Dr Jonathan Edgeworth PhD, FRCPATH 78.

867

868 Leadership, supervision and metadata curation:

869 Dr Gemma L Kay PhD 51.

870

871 Leadership, supervision, sequencing and analysis:

872 Dr Ana da Silva Filipe PhD 21 , Dr Aaron R Jeffries PhD 49, Dr Sascha Ott PhD 71, Professor Oliver Pybus

873 24 , Professor David L Robertson PhD 21, Dr David A Simpson PhD 6 , and Dr Chris Williams MB

874 BS33.

875

876 Samples, logistics, leadership and supervision:

877 Dr Cressida Auckland FRCPATH 50, Dr John Boyes MBChB83, Dr Samir Dervisevic FRCPATH52 , Professor

878 Sian Ellard FRCPATH49, 50 , Dr Sonia Goncalves1, Dr Emma J Meader FRCPATH 51, Dr Peter Muir

879 PhD2, Dr Husam Osman PhD 95, Reenesh Prakash MPH52, Dr Venkat Sivaprakasam PhD18, and Dr

880 Ian B Vipond PhD2.

881

882 Leadership, supervision and visualisation

883 Dr Jane AH Masoli MBChB 49, 50.

884

885 Sequencing, analysis and metadata curation

886 Dr Nabil-Fareed Alikhan PhD 51, Matthew Carlile BSc 54, Dr Noel Craine DPhil 33, Dr Sam T Haldenby PhD  
887 46, Dr Nadine Holmes PhD 54, Professor Ronan A Lyons MD 37, Dr Christopher Moore PhD 54,  
888 Malorie Perry MSc 33 , Dr Ben Warne MRCP80, and Dr Thomas Williams MD 19.

889

890 Samples, logistics and metadata curation:

891 Dr Lisa Berry PhD 72, Dr Andrew Bosworth PhD 95 ,Dr Julianne Rose Brown PhD40, Sharon Campbell  
892 MSc 67, Dr Anna Casey PhD 17, Dr Gemma Clark PhD 56, Jennifer Collins BSc 66, Dr Alison  
893 Cox PhD 43, 44 , Thomas Davis MSc 84, Gary Eltringham BSc 66, Dr Cariad Evans 38, 39 , Dr Clive  
894 Graham MD 64, Dr Fenella Halstead PhD 18, Dr Kathryn Ann Harris PhD 40, Dr Christopher Holmes  
895 PhD 58, Stephanie Hutchings 2 , Professor Miren Iturriza-Gomara PhD 46 , Dr Kate Johnson 38, 39,  
896 Katie Jones MSc 72, Dr Alexander J Keeley MRCP 38, Dr Bridget A Knight PhD 49, 50 , Cherian Koshy  
897 MSc, CSci, FIBMS 90, Steven Liggett 63 , Hannah Lowe MSc 81 , Dr Anita O Lucaci PhD 46 , Dr  
898 Jessica Lynch PhD MBChB 25, 29 , Dr Patrick C McClure PhD 55 , Dr Nathan Moore MBChB 31 ,  
899 Matilde Mori BSc 25, 29, 32 , Dr David G Partridge FRCP, FRCPath 38, 39 , Pinglawathee Madona 43,  
900 44 , Hannah M Pymont MSc 2 , Dr Paul Anthony Randell MBBCh 43, 44 , Dr Mohammad Raza 38, 39 ,  
901 Felicity Ryan MSc 81 , Dr Robert Shaw FRCPath 28, Dr Tim J Sloan PhD 57 , and Emma Swindells  
902 BSc 65 .

903

904 Sequencing, analysis, Samples and logistics:

905 Alexander Adams BSc 33, Dr Hibo Asad PhD 33, Alec Birchley MSc 33 , Tony Thomas Brooks BSc (Hons)  
906 41, Dr Giselda Bucca PhD 93, Ethan Butcher 70, Dr Sarah L Caddy PhD 13, Dr Laura G Caller PhD 2,  
907 3, 12 , Yasmin Chaudhry BSc 11, Jason Coombes BSc (HONS) 33, Michelle Cronin 33, Patricia L Dyal  
908 MPhil 41, Johnathan M Evans MSc 33,Laia Fina 33, Bree Gatica-Wilcox MPhil 33, Dr Iliana Georgana  
909 PhD 11, Lauren Gilbert A-Levels 33 , Lee Graham BSc 33, Danielle C Groves BA 38, Grant Hall BSc 11,  
910 Ember Hilvers MPH33 , Dr Myra Hosmillo PhD 11, Hannah Jones 33, Sophie Jones MSc 33, Fahad A  
911 Khokhar BSc 13 , Sara Kumziene-Summerhayes MSc 33, George MacIntyre-Cockett BSc 26, Dr  
912 Rocio T Martinez Nunez PhD 94 , Dr Caoimhe McKerr PhD 33 , Dr Claire McMurray PhD 15, Dr Richard  
913 Myers 7, Yasmin Nicole Panchbhaya BSc 41 , Malte L Pinckert MPhil 11 , Amy Plimmer 33 , Dr Joanne  
914 Stockton PhD 15 , Sarah Taylor 33 , Dr Alicia Thornton 7 , Amy Trebes MSc 26 , Alexander J Trotter

915 MRes 51 ,Helena Jane Tutill BSc 41 ,Charlotte A Williams BSc 41 , Anna Yakovleva BSc 11 and Dr  
916 Wen C Yew PhD 62.

917

918

919 Sequencing, analysis and software and analysis tools:

920 Dr Mohammad T Alam PhD 71 , Dr Laura Baxter PhD 71, Olivia Boyd MSc 96 , Dr Fabricia F. Nascimento  
921 PhD 96, Timothy M Freeman MPhil 38, Lily Geidelberg MSc 96, Dr Joseph Hughes PhD 21, David  
922 Jorgensen MSc 96, Dr Benjamin B Lindsey MRCP 38, Dr Richard J Orton PhD 21 , Dr Manon  
923 Ragonnet-Cronin PhD 96 Joel Southgate MSc 33, 34, and Dr Sreenu Vattipally PhD 21.

924

925 Samples, logistics and software and analysis tools:

926 Dr Igor Starinskij MSc MRCP 23.

927

928 Visualisation and software and analysis tools:

929 Dr Joshua B Singer PhD 21 , Dr Khalil Abudahab PhD 1, 30, Leonardo de Oliveira Martins PhD51 , Dr Thanh  
930 Le-Viet PhD 51 ,Mirko Menegazzo 30 ,Ben EW Taylor Meng 1, 30, and Dr Corin A Yeats PhD 30.

931

932 Project Administration:

933 Sophie Palmer 3, Carol M Churcher 3 , Dr Alisha Davies 33, Elen De Lacy MSc 33, Fatima Downing 33,  
934 Sue Edwards 33 , Dr Nikki Smith PhD 38 , Dr Francesc Coll PhD97 , Dr Nazreen F Hadjirin PhD3  
935 and Dr Frances Bolt PhD 44, 45 .

936

937 Leadership and supervision:

938 Dr. Alex Alderton 1, Dr Matt Berriman 1, Ian G Charles 51, Dr Nicholas Cortes MBChB 31 ,Dr Tanya Curran  
939 PhD 88 , Prof John Danesh 1, Dr Sahar Eldirdiri MBBS, MSC FRCPATH 84, Dr Ngozi Elumogo FRCPATH

940 52, Prof Andrew Hattersley FRS 49, 50, Professor Alison Holmes MD 44, 45, Dr Robin Howe 33, Dr  
941 Rachel Jones 33 , Anita Kenyon MSc 84, Prof Robert A Kingsley PhD 51, Professor Dominic  
942 Kwiatkowski 1, 9, Dr Cordelia Langford1, Dr Jenifer Mason MBBS 48, Dr Alison E Mather PhD 51, Lizzie  
943 Meadows MA 51, Dr Sian Morgan FRCPATH 36, Dr James Price PhD 44, 45, Trevor I Robinson MSc 48  
944 , Dr Giri Shankar 33 , John Wain 51, and Dr Mark A Webber PhD51 .

945

946 Metadata curation:

947 Dr Declan T Bradley PhD 5, 6 ,Dr Michael R Chapman PhD 1, 3, 4 , Dr Derrick Crooke 28 , Dr David Eyre  
948 PhD 28, Professor Martyn Guest PhD34 , Huw Gulliver 34 , Dr Sarah Hoosdally 28 , Dr Christine  
949 Kitchen PhD 34 , Dr Ian Merrick PhD 34, Siddharth Mookerjee MPH 44, 45 , Robert Munn BSc 34 ,  
950 Professor Timothy Peto PhD28, Will Potter 52, Dr Dheeraj K Sethi MBBS 52, Wendy Smith 56 ,Dr Luke  
951 B Snell MB BS 75, 94 , Dr Rachael Stanley PhD 52 , Claire Stuart 52 and Dr Elizabeth Wastenge MD  
952 20.

953

954 Sequencing and analysis:

955 Dr Erwan Acheson PhD 6 , Safiah Afifi BSc 36 , Dr Elias Allara MD PhD 2, 3 , Dr Roberto Amato 1, Dr  
956 Adrienn Angyal PhD38, Dr Elihu Aranday-Cortes PhD/DVM21 , Cristina Ariani 1, Jordan Ashworth 19,  
957 Dr Stephen Attwood 24, Alp Aydin MSci 51 , David J Baker BEng 51 , Dr Carlos E Balcazar PhD 19,  
958 Angela Beckett MSc 68 Robert Beer BSc 36 , Dr Gilberto Betancor PhD76, Emma  
959 Betteridge 1 , Dr David Bibby 7 , Dr Daniel Bradshaw 7 , Catherine Bresner Bsc(Hons) 34, Dr  
960 Hannah E Bridgewater PhD 71 , Alice Broos BSc (Hons) 21 , Dr Rebecca Brown PhD 38 , Dr Paul E  
961 Brown PhD 71, Dr Kirstyn Brunner PhD 22 , Dr Stephen N Carmichael PhD 21 , Jeffrey K. J. Cheng  
962 MSc 71, Dr Rachel Colquhoun DPhil 19 , Dr Gavin Dabrera 7 , Dr Johnny Debebe PhD 54, Eleanor  
963 Drury 1, Dr Louis du Plessis 24 , Richard Eccles MSc 46, Dr Nicholas Ellaby 7, Audrey Farbos MSc 49,  
964 Ben Farr 1 ,Dr Jacqueline Findlay PhD 41 , Chloe L Fisher MSc 74, Leysa Marie Forrest MSc 41, Dr  
965 Sarah Francois 24, Lucy R. Frost BSc 71, William Fuller BSc 34 , Dr Eileen Gallagher 7 , Dr Michael D  
966 Gallagher PhD19 , Matthew Gemmell MSc 46, Dr Rachel AJ Gilroy PhD 51, Scott Goodwin 1, Dr Luke R  
967 Green PhD 38 ,Dr Richard Gregory PhD 46 ,Dr Natalie Groves 7 ,Dr James W Harrison PhD 49,  
968 Hassan Hartman 7 , Dr Andrew R Hesketh PhD93,Verity Hill 19, Dr Jonathan Hubb 7 ,Dr Margaret

969 Hughes PhD46 ,Dr David K Jackson 1 ,Dr Ben Jackson PhD 19 ,Dr Keith James 1 ,Natasha Johnson  
970 BSc (Hons)21 ,Ian Johnston 1, Jon-Paul Keatley 1, Dr Moritz Kraemer 24, Dr Angie Lackenby 7, Dr  
971 Mara Lawniczak 1 , Dr David Lee 7, Rich Livett 1, Stephanie Lo 1, Daniel Mair BSc (Hons) 21, Joshua  
972 Maksimovic FD sport science 36, Nikos Manesis 7 ,Dr Robin Manley Ph.D 49, Dr Carmen Manso 7 ,Dr  
973 Angela Marchbank BSc 34 ,Dr Inigo Martincorena 1 ,Dr Tamyo Mbisa 7, Kathryn McCluggage MSC  
974 36,Dr JT McCrone PhD 19, Shahjahan Miah 7 , Michelle L Michelsen BSc 49 , Dr Mari Morgan PhD 33,  
975 Dr Gaia Nebbia PhD, FRCPath 78,Charlotte Nelson MSc 46 ,Jenna Nichols BSc (Hons) 21 ,Dr Paola  
976 Niola PhD 41 ,Dr Kyriaki Nomikou PhD21 ,Steve Palmer 1 , Dr. Naomi Park 1, Dr Yasmin A Parr PhD21  
977 ,Dr Paul J Parsons PhD 38 , Vineet Patel 7 ,Dr. Minal Patel 1 ,Clare Pearson MSc 2, 1 ,Dr Steven Platt  
978 7 ,Christoph Puethe 1, Dr. Mike Quail 1,Dr JaynaRaghwani 24 , Dr Lucille Rainbow PhD 46 ,Shavanthi  
979 Rajatileka 1 ,Dr Mary Ramsay 7 ,Dr Paola C Resende Silva PhD 41, 42, Steven Rudder 51, Dr Chris  
980 Ruis 3 ,Dr Christine M Sambles PhD 49 ,Dr Fei Sang PhD 54 ,Dr Ulf Schaefer7 ,Dr Emily Scher PhD 19  
981 ,Dr. Carol Scott 1 ,Lesley Shirley 1, Adrian W Signell BSc 76 ,John Sillitoe 1 ,Christen Smith 1 ,Dr  
982 Katherine L Smollett PhD 21 ,Karla Spellman FD 36 ,Thomas D Stanton BSc 19 ,Dr David J Studholme  
983 PhD 49 ,Ms Grace Taylor-Joyce BSc 71 ,Dr Ana P Tedim PhD 51 ,Dr Thomas Thompson PhD6 ,Dr  
984 Nicholas M Thomson PhD 51 ,Scott Thurston1 ,Lily Tong PhD 21 ,Gerry Tonkin-Hill 1, Rachel M Tucker  
985 MSc 38 , Dr Edith E Vamos PhD 4,Dr Tetyana Vasylyeva24 , Joanna Warwick-Dugdale BSc 49 , Danni  
986 Weldon 1 ,Dr Mark Whitehead PhD 46 ,Dr David Williams 7,Dr Kathleen A Williamson PhD19,Harry D  
987 Wilson BSc 76,Trudy Workman HNC 34 ,Dr Muhammad Yasir PhD 51, Dr Xiaoyu Yu PhD 19, and Dr  
988 Alex Zarebski 24.

989

990 Samples and logistics:\_\_\_\_\_

991 Dr Evelien M Adriaenssens PhD 51, Dr Shazaad S Y Ahmad MSc 2, 47 , Adela Alcolea-Medina MPharm 59,  
992 77 ,Dr John Allan PhD60, Dr Patawee Asamaphan PhD21, Laura Atkinson MSc 40, Paul Baker MD 63,  
993 Professor Jonathan Ball PhD 55, Dr Edward Barton MD64, Dr. Mathew A Beale1, Dr. Charlotte Beaver1  
994 , Dr Andrew Beggs PhD16, Dr Andrew Bell PhD51, Duncan J Berger 1, Dr Louise Berry. 56, Claire M  
995 Bewshea MSc 49, Kelly Bicknell 70, Paul Bird 58, Dr Chloe Bishop 7 , Dr Tim Boswell 56, Cassie Breen  
996 BSc48, Dr Sarah K Buddenborg1, Dr Shirelle Burton-Fanning MD 66, Dr Vicki Chalker 7, Dr Joseph G  
997 Chappell PhD 55, Themoula Charalampous MSc 78, 94, Claire Cormie3, Dr Nick Cortes PhD29, 25, Dr  
998 Lindsay J Coupland PhD 52, Angela Cowell MSc48 , Dr Rose K Davidson PhD 53 , Joana Dias MSc3 ,

999 Dr Maria Diaz PhD51 , Thomas Dibling1, Matthew J Dorman1, Dr Nichola Duckworth57, Scott Elliott70,  
1000 Sarah Essex63, Karlie Fallon 58 , Theresa Feltwell 8 , Dr Vicki M Fleming PhD 56, Sally Forrest BSc 3,  
1001 Luke Foulser1, Maria V Garcia-Casado1, Dr Artemis Gavriil PhD 41, Dr Ryan P George PhD47, Laura  
1002 Gifford MSc 33, Harmeet K Gill PhD3, Jane Greenaway MSc65, Luke Griffith Bsc53, Ana Victoria  
1003 Gutierrez51, Dr Antony D Hale MBBS85, Dr Tanzina Haque FRCPath, PhD91, Katherine L Harper  
1004 MBiol85, Dr Ian Harrison 7 , Dr Judith Heaney PhD89, Thomas Helmer 58, Ellen E Higginson PhD 3 ,  
1005 Richard Hopes 2, Dr Hannah C Howson-Wells PhD 56, Dr Adam D Hunter 1, Robert Impey 70, Dr  
1006 Dianne Irish-Tavares FRCPath 91, David A Jackson1 , Kathryn A Jackson MSc 46 , Dr Amelia Joseph  
1007 56, Leanne Kane 1, Sally Kay 1, Leanne M Kermack MSc 3, Manjinder Khakh 56, Dr Stephen P Kidd  
1008 PhD29, 25,31, , Dr Anastasia Kolyva PhD 51, Jack CD Lee BSc 40, Laura Letchford 1 , Nick Levene  
1009 MSc79, Dr LisaJ Levett PhD 89, Dr Michelle M Lister PhD 56, Allyson Lloyd 70 , Dr Joshua Loh PhD60 ,  
1010 Dr Louissa R Macfarlane-Smith PhD85, Dr Nicholas W Machin MSc 2 , 47, Mailis Maes M.phil3, Dr  
1011 Samantha McGuigan 1, Liz McMinn 1, Dr Lamia Mestek-Boukhibar D.Phil 41, Dr Zoltan Molnar PhD 6,  
1012 Lynn Monaghan 79, Dr Catrin Moore 27, Plamena Naydenova BSc 3, Alexandra S Neaverson 1, Dr.  
1013 Rachel Nelson PhD 1, Marc O Niebel MSc21 , Elaine O'Toole BSc 48 , Debra Padgett BSc 64, Gaurang  
1014 Patel 1 , Dr Brendan Al Payne MD 66, Liam Prestwood 1, Dr Veena Raviprakash MD67, Nicola  
1015 Reynolds PhD86 Dr Alex Richter PhD 16, Dr Esther Robinson PhD95, Dr Hazel A Rogers1, Dr Aileen  
1016 Rowan PhD 96, Garren Scott BSc 64, Dr Divya Shah PhD40, Nicola Sheriff BSc 67, Dr Graciela Sluga  
1017 MD - MSc92 , Emily Souster1, Dr. Michael Spencer-Chapman1, Sushmita Sridhar BSc1, 3, Tracey  
1018 Swingler 53, Dr Julian Tang58, Professor Graham P Taylor DSc96, Dr Theocharis Tsoleridis PhD55, Dr  
1019 Lance Turtle PhD MRCP46, Dr Sarah Walsh 57, Dr Michelle Wantoch PhD 86, Joanne Watts BSc48 ,  
1020 Dr Sheila Waugh MD66, Sam Weeks41, Dr Rebecca Williams BMBS 31, Dr Iona Willingham56, Dr  
1021 Emma L Wise PhD 25, 29, 31, Victoria Wright BSc 54, Dr Sarah Wyllie 70 , and Jamie Young BSc 3.

1022

1023 Software and analysis tools

1024 Amy Gaskin MSc33, Dr Will Rowe PhD 15, and Dr Igor Siveroni PhD96.

1025

1026 Visualisation:

1027 Dr Robert Johnson PhD 96.



1028

1029 1 Wellcome Sanger Institute, 2 Public Health England, 3 University of Cambridge, 4 Health Data Research  
1030 UK, Cambridge, 5 Public Health Agency, Northern Ireland ,6 Queen's University Belfast 7 Public Health  
1031 England Colindale, 8 Department of Medicine, University of Cambridge, 9 University of Oxford, 10  
1032 Departments of Infectious Diseases and Microbiology, Cambridge University Hospitals NHS Foundation  
1033 Trust; Cambridge, UK, 11 Division of Virology, Department of Pathology, University of Cambridge, 12  
1034 The Francis Crick Institute, 13 Cambridge Institute for Therapeutic Immunology and Infectious Disease,  
1035 Department of Medicine, 14 Public Health England, Clinical Microbiology and Public Health Laboratory,  
1036 Cambridge, UK, 15 Institute of Microbiology and Infection, University of Birmingham, 16 University of  
1037 Birmingham, 17 Queen Elizabeth Hospital, 18 Heartlands Hospital, 19 University of Edinburgh, 20 NHS  
1038 Lothian, 21 MRC-University of Glasgow Centre for Virus Research, 22 Institute of Biodiversity, Animal  
1039 Health & Comparative Medicine, University of Glasgow, 23 West of Scotland Specialist Virology Centre,  
1040 24 Dept Zoology, University of Oxford, 25 University of Surrey, 26 Wellcome Centre for Human  
1041 Genetics, Nuffield Department of Medicine, University of Oxford, 27 Big Data Institute, Nuffield  
1042 Department of Medicine, University of Oxford, 28 Oxford University Hospitals NHS Foundation Trust, 29  
1043 Basingstoke Hospital, 30 Centre for Genomic Pathogen Surveillance, University of Oxford, 31  
1044 Hampshire Hospitals NHS Foundation Trust, 32 University of Southampton, 33 Public Health Wales  
1045 NHS Trust, 34 Cardiff University, 35 Betsi Cadwaladr University Health Board, 36 Cardiff and Vale  
1046 University Health Board, 37 Swansea University, 38 University of Sheffield, 39 Sheffield Teaching  
1047 Hospitals, 40 Great Ormond Street NHS Foundation Trust, 41 University College London, 42 Oswaldo  
1048 Cruz Institute, Rio de Janeiro 43 North West London Pathology, 44 Imperial College Healthcare NHS  
1049 Trust, 45 NIHR Health Protection Research Unit in HCAI and AMR, Imperial College London, 46  
1050 University of Liverpool, 47 Manchester University NHS Foundation Trust, 48 Liverpool Clinical  
1051 Laboratories, 49 University of Exeter, 50 Royal Devon and Exeter NHS Foundation Trust, 51 Quadram  
1052 Institute Bioscience, University of East Anglia, 52 Norfolk and Norwich University Hospital, 53 University  
1053 of East Anglia, 54 Deep Seq, School of Life Sciences, Queens Medical Centre, University of  
1054 Nottingham, 55 Virology, School of Life Sciences, Queens Medical Centre, University of Nottingham, 56  
1055 Clinical Microbiology Department, Queens Medical Centre, 57 PathLinks, Northern Lincolnshire & Goole  
1056 NHS Foundation Trust, 58 Clinical Microbiology, University Hospitals of Leicester NHS Trust, 59  
1057 Viapath, 60 Hub for Biotechnology in the Built Environment, Northumbria University, 61 NU-OMICS  
1058 Northumbria University, 62 Northumbria University, 63 South Tees Hospitals NHS Foundation Trust, 64

1059 North Cumbria Integrated Care NHS Foundation Trust, 65 North Tees and Hartlepool NHS Foundation  
1060 Trust, 66 Newcastle Hospitals NHS Foundation Trust, 67 County Durham and Darlington NHS  
1061 Foundation Trust, 68 Centre for Enzyme Innovation, University of Portsmouth, 69 School of Biological  
1062 Sciences, University of Portsmouth, 70 Portsmouth Hospitals NHS Trust, 71 University of Warwick, 72  
1063 University Hospitals Coventry and Warwickshire, 73 Warwick Medical School and Institute of Precision  
1064 Diagnostics, Pathology, UHCW NHS Trust, 74 Genomics Innovation Unit, Guy's and St. Thomas' NHS  
1065 Foundation Trust, 75 Centre for Clinical Infection & Diagnostics Research, St. Thomas' Hospital and  
1066 Kings College London, 76 Department of Infectious Diseases, King's College London, 77 Guy's and St.  
1067 Thomas' Hospitals NHS Foundation Trust, 78 Centre for Clinical Infection and Diagnostics Research,  
1068 Department of Infectious Diseases, Guy's and St Thomas' NHS Foundation Trust, 79 Princess  
1069 Alexandra Hospital Microbiology Dept. , 80 Cambridge University Hospitals NHS Foundation Trust, 81  
1070 East Kent Hospitals University NHS Foundation Trust, 82 University of Kent, 83 Gloucestershire  
1071 Hospitals NHS Foundation Trust, 84 Department of Microbiology, Kettering General Hospital, 85  
1072 National Infection Service, PHE and Leeds Teaching Hospitals Trust, 86 Cambridge Stem Cell Institute,  
1073 University of Cambridge, 87 Public Health Scotland, 88 Belfast Health & Social Care Trust, 89 Health  
1074 Services Laboratories, 90 Barking, Havering and Redbridge University Hospitals NHS Trust, 91 Royal  
1075 Free NHS Trust, 92 Maidstone and Tunbridge Wells NHS Trust, 93 University of Brighton, 94 Kings  
1076 College London, 95 PHE Heartlands, 96 Imperial College London, 97 Department of Infection Biology,  
1077 London School of Hygiene and Tropical Medicine.

**TABLE 1**

|                                    | Overall    |     | Community  |     | Indeterminate |     | Probable nosocomial |     | Definite nosocomial |     |
|------------------------------------|------------|-----|------------|-----|---------------|-----|---------------------|-----|---------------------|-----|
| <b>Cases (n)</b>                   | 574        |     | 462        | 80% | 22            | 4%  | 27                  | 5%  | 63                  | 11% |
| <b>In-hospital mortality</b>       | 114        | 20% | 78         | 17% | 5             | 23% | 9                   | 33% | 23                  | 37% |
| <b>Sex</b>                         |            |     |            |     |               |     |                     |     |                     |     |
| <b>Female</b>                      | 251        | 44% | 203        | 44% | 6             | 27% | 12                  | 44% | 30                  | 48% |
| <b>Male</b>                        | 323        | 56% | 259        | 56% | 16            | 73% | 15                  | 56% | 33                  | 52% |
| <b>Median age (IQR)</b>            | 61 (48-76) |     | 58 (45-73) |     | 73 (61-77)    |     | 73 (65-81)          |     | 73 (61-81)          |     |
| <b>Ethnicity</b>                   |            |     |            |     |               |     |                     |     |                     |     |
| <b>Asian</b>                       | 27         | 5%  | 23         | 5%  | 0             | 0%  | 1                   | 4%  | 3                   | 5%  |
| <b>Black</b>                       | 157        | 27% | 141        | 31% | 4             | 18% | 4                   | 15% | 8                   | 13% |
| <b>Other</b>                       | 36         | 6%  | 33         | 7%  | 1             | 5%  | 0                   | 0%  | 2                   | 3%  |
| <b>White</b>                       | 230        | 40% | 170        | 37% | 6             | 27% | 15                  | 56% | 39                  | 62% |
| <b>Mixed</b>                       | 5          | 1%  | 4          | 1%  | 1             | 5%  | 0                   | 0%  | 0                   | 0%  |
| <b>Unknown</b>                     | 119        | 21% | 91         | 20% | 10            | 45% | 7                   | 26% | 11                  | 17% |
| <b>Known BAME</b>                  | 455        | 79% | 371        | 80% | 12            | 55% | 20                  | 74% | 52                  | 83% |
| <b>BAME</b>                        | 225        | 49% | 201        | 54% | 6             | 50% | 5                   | 25% | 13                  | 25% |
| <b>Pregnant</b>                    | 13         | 2%  | 13         | 3%  | 0             | 0%  | 0                   |     | 0                   | 0%  |
| <b>Smoker</b>                      |            |     |            |     |               |     |                     |     |                     |     |
| <b>Never</b>                       | 449        | 78% | 373        | 80% | 17            | 77% | 15                  | 56% | 44                  | 70% |
| <b>Current</b>                     | 26         | 5%  | 17         | 4%  | 2             | 9%  | 3                   | 11% | 4                   | 6%  |
| <b>Ex</b>                          | 99         | 17% | 72         | 16% | 3             | 14% | 9                   | 33% | 15                  | 24% |
| <b>Alcohol excess</b>              | 17         | 3%  | 12         | 3%  | 1             | 5%  | 1                   | 4%  | 3                   | 5%  |
| <b>Charlson score (IQR)</b>        | 3 (1-5)    |     | 2 (0-5)    |     | 4 (3-6)       |     | 5 (4-6)             |     | 5 (4-6)             |     |
| <b>Solid tumor</b>                 | 71         | 12% | 45         | 10% | 6             | 27% | 4                   | 15% | 16                  | 25% |
| <b>Localised</b>                   | 53         | 9%  | 36         | 8%  | 3             | 14% | 2                   | 7%  | 12                  | 19% |
| <b>Metastatic</b>                  | 18         | 3%  | 9          | 2%  | 3             | 14% | 2                   | 7%  | 4                   | 6%  |
| <b>Haematological malignancy</b>   | 14         | 2%  | 4          | 1%  | 2             | 9%  | 2                   | 7%  | 6                   | 10% |
| <b>Lymphoma</b>                    | 7          | 1%  | 1          | 0%  | 2             | 9%  | 1                   | 4%  | 3                   | 5%  |
| <b>Leukaemia</b>                   | 7          | 1%  | 3          | 1%  | 0             | 0%  | 1                   | 4%  | 3                   | 5%  |
| <b>Renal impairment</b>            | 110        | 19% | 84         | 18% | 3             | 14% | 9                   | 33% | 14                  | 22% |
| <b>Mild</b>                        | 49         | 9%  | 33         | 7%  | 3             | 14% | 4                   | 15% | 9                   | 14% |
| <b>Moderate</b>                    | 7          | 1%  | 5          | 1%  | 0             | 0%  | 1                   | 4%  | 1                   | 2%  |
| <b>Severe</b>                      | 54         | 9%  | 46         | 10% | 0             | 0%  | 4                   | 15% | 4                   | 6%  |
| <b>Chronic liver disease</b>       | 15         | 3%  | 11         | 2%  | 0             | 0%  | 0                   | 0%  | 4                   | 6%  |
| <b>Dementia</b>                    | 50         | 9%  | 29         | 6%  | 3             | 14% | 4                   | 15% | 14                  | 22% |
| <b>Immunosuppression</b>           | 35         | 6%  | 24         | 5%  | 0             | 0%  | 2                   | 7%  | 9                   | 14% |
| <b>HIV/AIDS</b>                    | 2          | 0%  | 2          | 0%  | 0             | 0%  | 0                   | 0%  | 0                   | 0%  |
| <b>Peptic ulcer disease</b>        | 9          | 2%  | 5          | 1%  | 0             | 0%  | 0                   | 0%  | 4                   | 6%  |
| <b>Diabetes mellitus</b>           | 168        | 29% | 134        | 29% | 5             | 23% | 10                  | 37% | 19                  | 30% |
| <b>End organ damage</b>            | 38         | 7%  | 27         | 6%  | 2             | 9%  | 5                   | 19% | 4                   | 6%  |
| <b>Connective tissue disease</b>   | 13         | 2%  | 10         | 2%  | 1             | 5%  | 0                   |     | 2                   | 3%  |
| <b>Hypertension</b>                | 257        | 45% | 199        | 43% | 9             | 41% | 17                  | 63% | 32                  | 51% |
| <b>TIA/CVA</b>                     | 45         | 8%  | 28         | 6%  | 1             | 5%  | 1                   | 4%  | 15                  | 24% |
| <b>Congestive cardiac failure</b>  | 28         | 5%  | 13         | 3%  | 0             | 0%  | 5                   | 19% | 10                  | 16% |
| <b>Peripheral vascular disease</b> | 13         | 2%  | 6          | 1%  | 1             | 5%  | 3                   | 11% | 3                   | 5%  |
| <b>Myocardial infarction</b>       | 19         | 3%  | 11         | 2%  | 1             | 5%  | 3                   | 11% | 4                   | 6%  |
| <b>COPD</b>                        | 46         | 8%  | 29         | 6%  | 2             | 9%  | 4                   | 15% | 11                  | 17% |

Figure 1

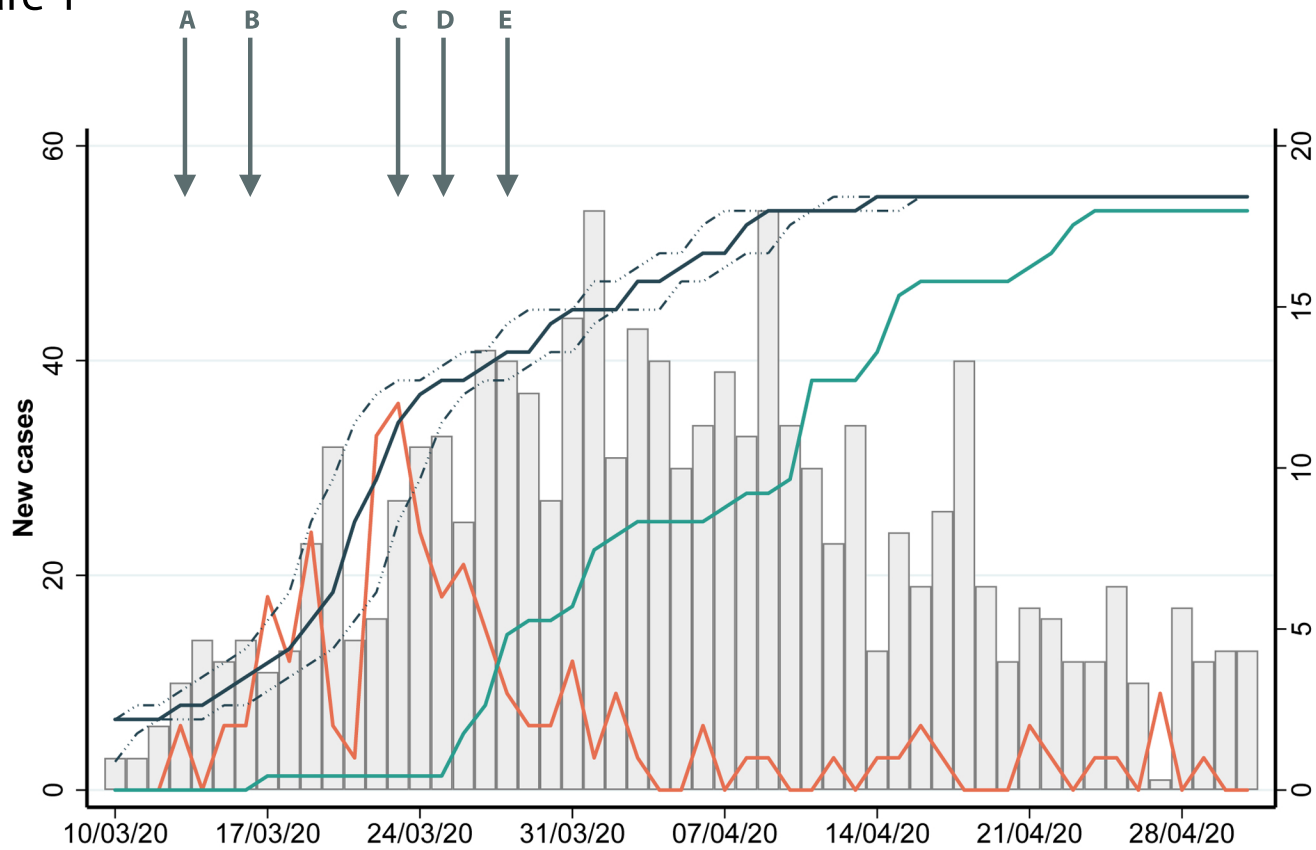

# Figure 2

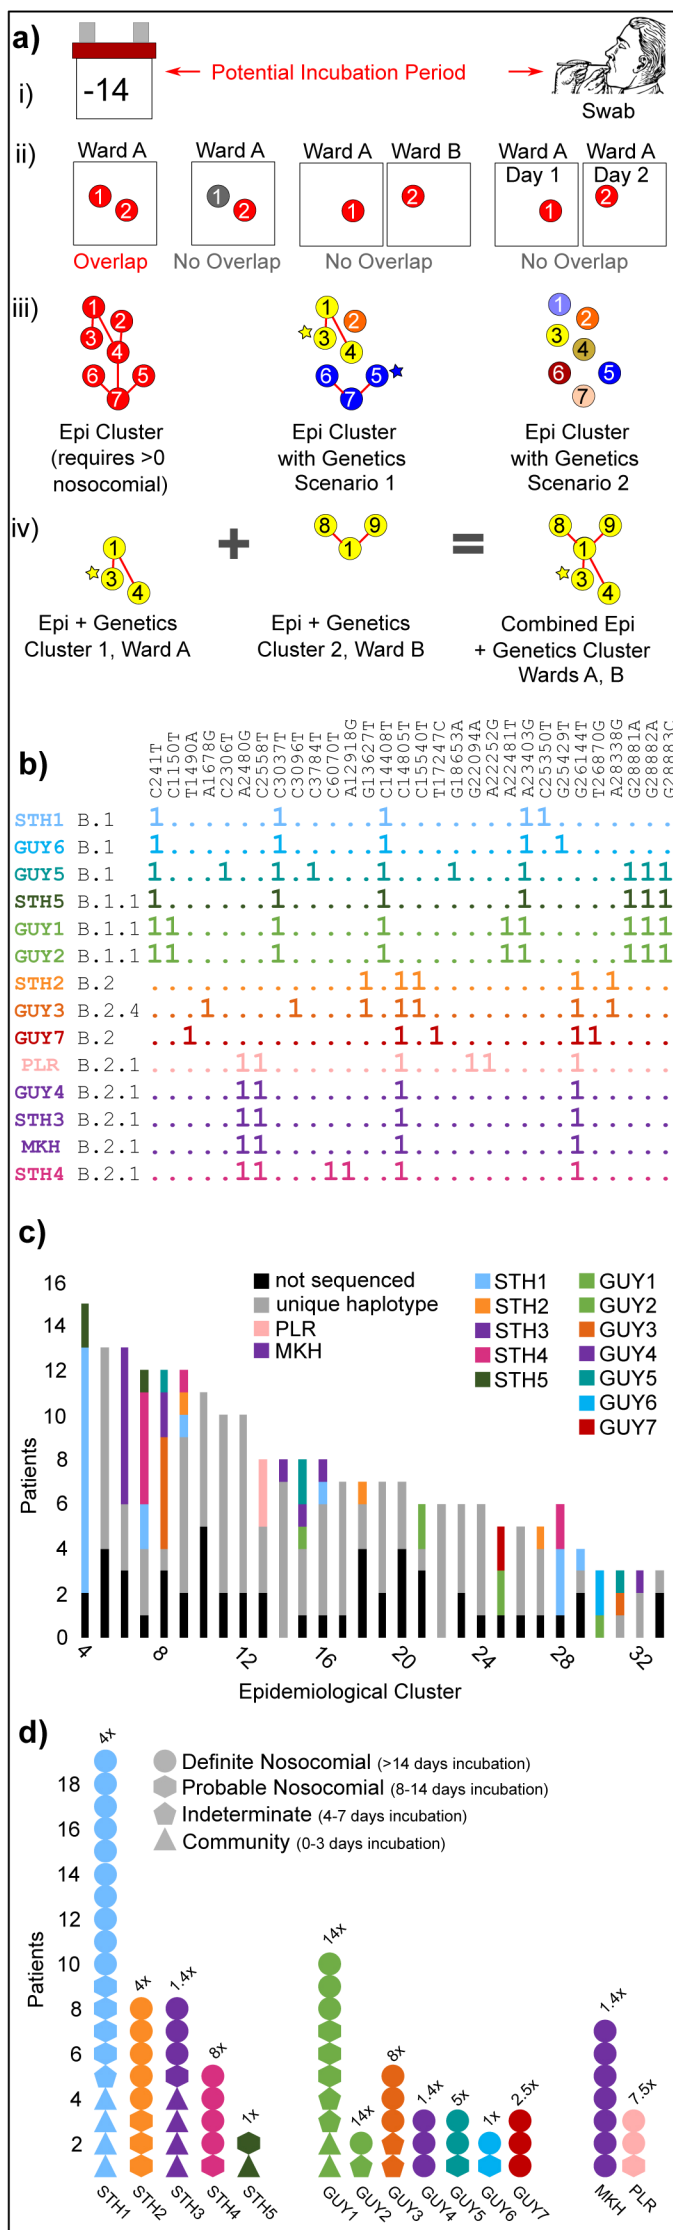

**Figure 3**

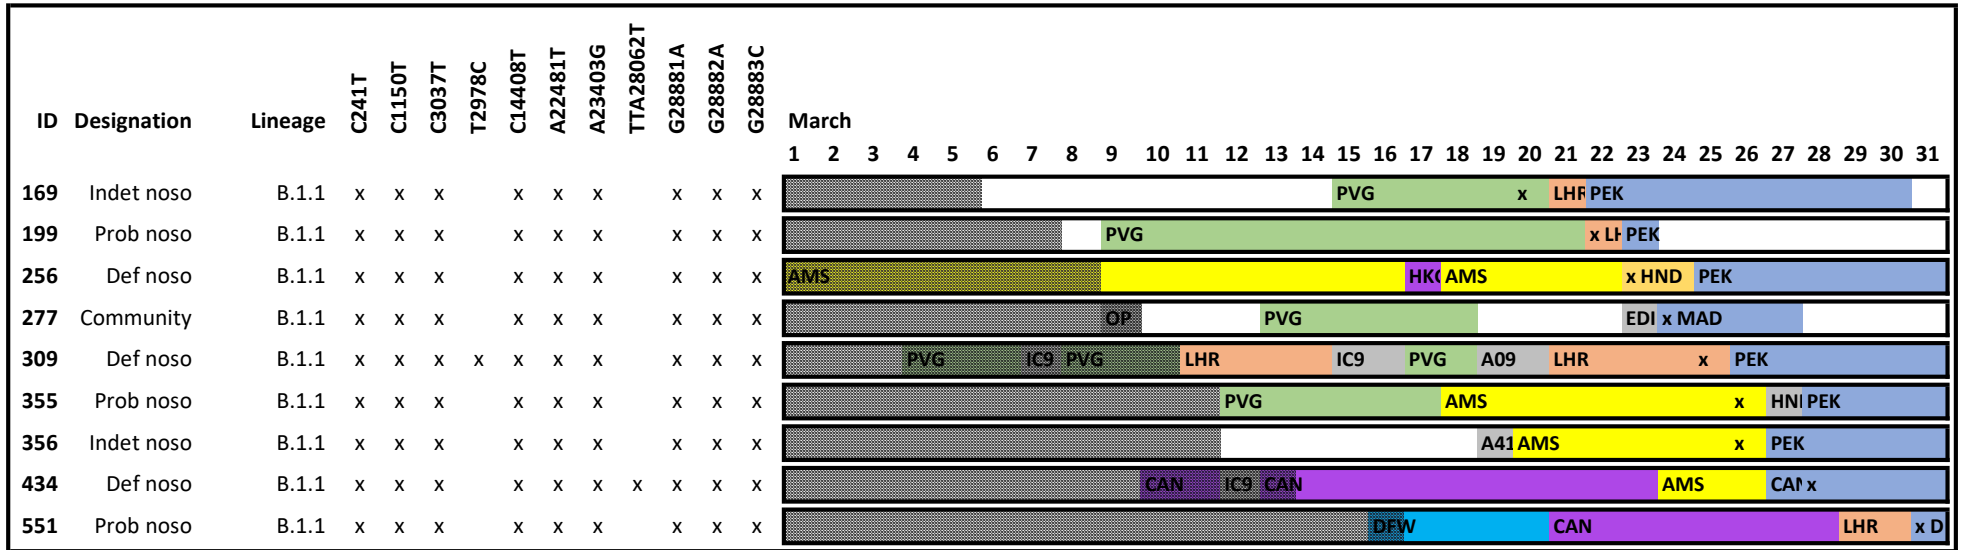

Figure 4

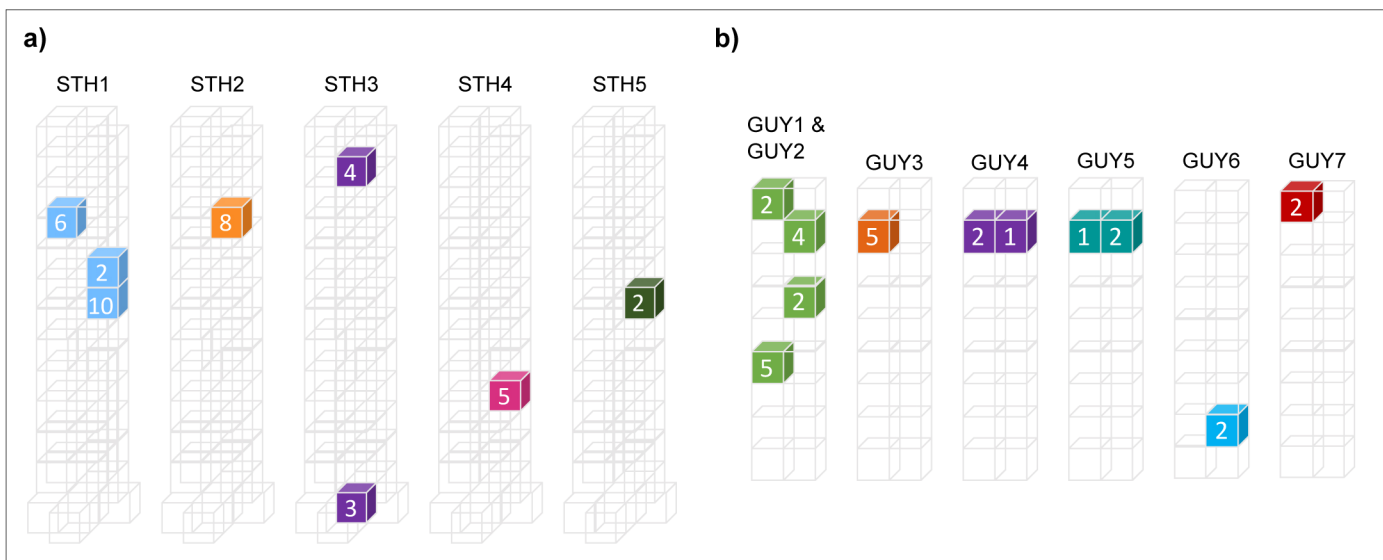

# Figure 5

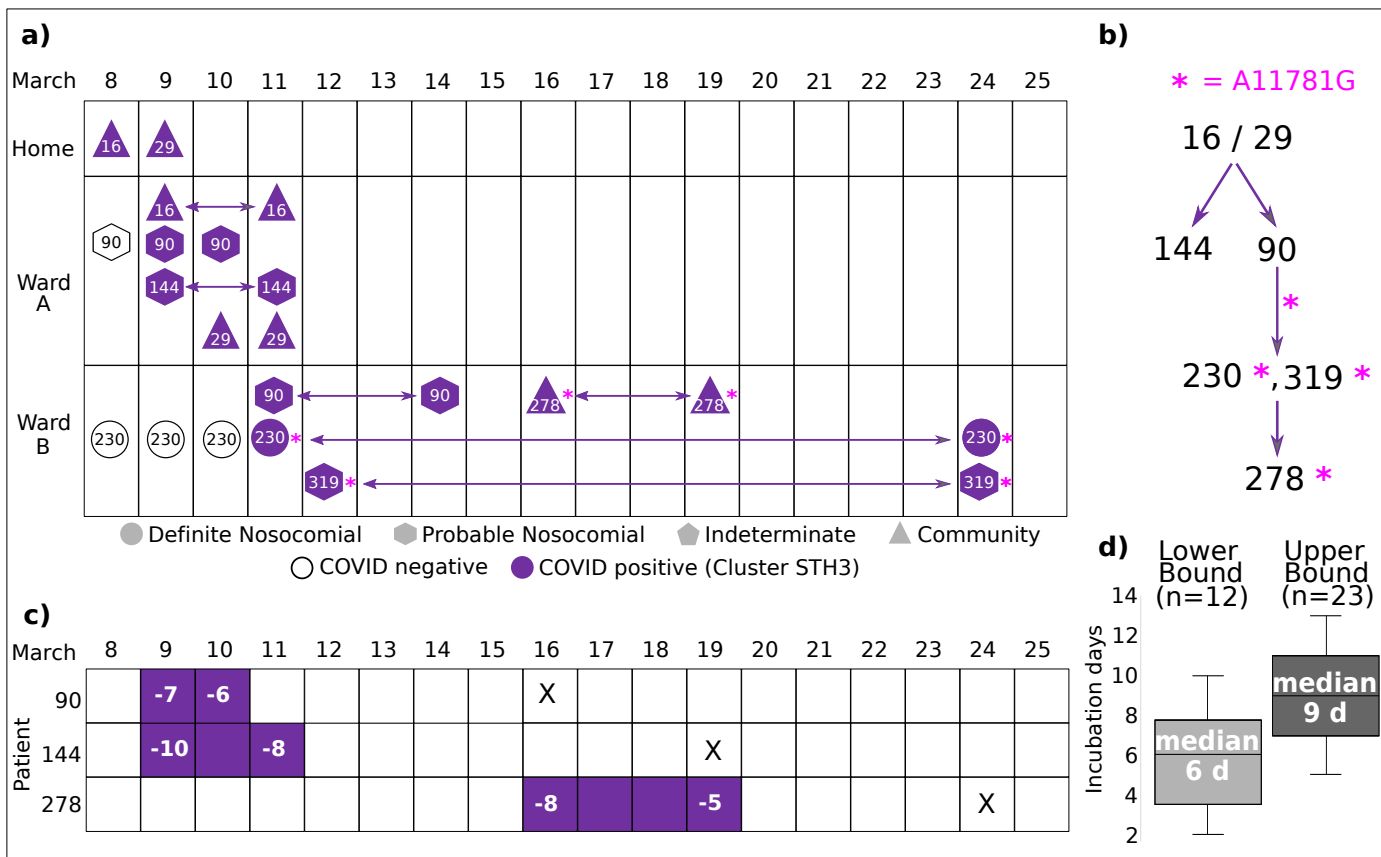

Source: https://www.medrxiv.org/content/medrxiv/early/2020/11/18/2020.11.17.20232827.full.pdf
